# Supplementary material for: Pregnancy among adolescent girls in humanitarian settings: a case in refugee camp of Gambella regional state, community-based cross-sectional study, Southwest Ethiopia, 2021
Source: PubMed Central journal article supplement — BMJ Open. 2022 Nov 16;12(11):e064732. doi: 10.1136/bmjopen-2022-064732 (PMC9677029; doi:10.1136/bmjopen-2022-064732), 2022-11-16
Supplement: bmjopen-2022-064732.draft_revisions.pdf [file bmjopen-2022-064732.draft_revisions.pdf]

# BMJ Open

BMJ Open is committed to open peer review. As part of this commitment we make the peer review history of every article we publish publicly available.

When an article is published we post the peer reviewers' comments and the authors' responses online. We also post the versions of the paper that were used during peer review. These are the versions that the peer review comments apply to.

The versions of the paper that follow are the versions that were submitted during the peer review process. They are not the versions of record or the final published versions. They should not be cited or distributed as the published version of this manuscript.

BMJ Open is an open access journal and the full, final, typeset and author-corrected version of record of the manuscript is available on our site with no access controls, subscription charges or pay-per-view fees (<http://bmjopen.bmj.com>).

If you have any questions on BMJ Open's open peer review process please email [info.bmjopen@bmj.com](mailto:info.bmjopen@bmj.com)

# BMJ Open

**Pregnancy among Adolescents Girls in Humanitarian settings: A case in Refugee Camp of Gambella Regional state, Community Based Cross-Sectional Study, Southwest Ethiopia, 2021**

|                               |                                                                                                                                                                                                    |
|-------------------------------|----------------------------------------------------------------------------------------------------------------------------------------------------------------------------------------------------|
| Journal:                      | <i>BMJ Open</i>                                                                                                                                                                                    |
| Manuscript ID                 | bmjopen-2022-064732                                                                                                                                                                                |
| Article Type:                 | Original research                                                                                                                                                                                  |
| Date Submitted by the Author: | 17-May-2022                                                                                                                                                                                        |
| Complete List of Authors:     | Bol, Koang Nyak; World Health Organization, PRSEAH Program Negera, Ebissa; Mettu University, Public Health Geda, Abdi; Mettu University, Public Health Department; Jimma University, Family Health |
| Keywords:                     | Reproductive medicine < GYNAECOLOGY, Public health < INFECTIOUS DISEASES, Maternal medicine < OBSTETRICS, Sexual and gender disorders < PSYCHIATRY, SEXUAL MEDICINE                                |
|                               |                                                                                                                                                                                                    |

SCHOLARONE™  
Manuscripts

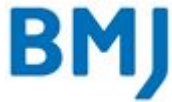

I, the Submitting Author has the right to grant and does grant on behalf of all authors of the Work (as defined in the below author licence), an exclusive licence and/or a non-exclusive licence for contributions from authors who are: i) UK Crown employees; ii) where BMJ has agreed a CC-BY licence shall apply, and/or iii) in accordance with the terms applicable for US Federal Government officers or employees acting as part of their official duties; on a worldwide, perpetual, irrevocable, royalty-free basis to BMJ Publishing Group Ltd ("BMJ") its licensees and where the relevant Journal is co-owned by BMJ to the co-owners of the Journal, to publish the Work in this journal and any other BMJ products and to exploit all rights, as set out in our [licence](#).

The Submitting Author accepts and understands that any supply made under these terms is made by BMJ to the Submitting Author unless you are acting as an employee on behalf of your employer or a postgraduate student of an affiliated institution which is paying any applicable article publishing charge ("APC") for Open Access articles. Where the Submitting Author wishes to make the Work available on an Open Access basis (and intends to pay the relevant APC), the terms of reuse of such Open Access shall be governed by a Creative Commons licence – details of these licences and which [Creative Commons](#) licence will apply to this Work are set out in our licence referred to above.

Other than as permitted in any relevant BMJ Author's Self Archiving Policies, I confirm this Work has not been accepted for publication elsewhere, is not being considered for publication elsewhere and does not duplicate material already published. I confirm all authors consent to publication of this Work and authorise the granting of this licence.

1  
2  
3  
4 1 Pregnancy among Adolescents Girls in Humanitarian settings: A case in  
5 2 Refugee Camp of Gambella Regional state, Community Based Cross-  
6 3 Sectional Study, Southwest Ethiopia, 2021  
7  
8  
9

10 5 [Koang Nyak Bol \(koang.nb2013@gmail.com\)](mailto:koang.nb2013@gmail.com)<sup>1</sup>, [Ebissa Negera \(ebissanegera@yahoo.com\)](mailto:ebissanegera@yahoo.com)<sup>2</sup>, [Abdi Geda](mailto:abdi.geda@meu.edu.et)  
11  
12 6 [\(abdi.geda@meu.edu.et\)](mailto:abdi.geda@meu.edu.et)<sup>2</sup>  
13

14 7 1 Regional Health Office, , Gambella, Gambella Regional State, Ethiopia  
15

16 8 2 Public Health Departments, College of Health Science, Mettu University, Mettu, Oromia Region,  
17  
18 9 Ethiopia  
19

20  
21 10 **Correspondence:** *Abdi Geda*  
22

23 11 Public Health Department, College of Health Science, Mettu University, PO Box: 318, Mettu, Oromia  
24

25 12 Region, Ethiopia; *Email:* [abdi.geda@meu.edu.et](mailto:abdi.geda@meu.edu.et)  
26

27 13 *ORCID ID:* <https://orcid.org/0000-0003-3534-4308>  
28

29 14 **ABSTRACT**

30  
31 15 Objective: The aim of this study was to assess the prevalence of pregnancy and associated factors among  
32  
33 16 adolescent girls in the Nguenyiel refugee camp.  
34

35  
36 17 Methods: A community-based cross-sectional study was done. The Systematic random sampling technique was  
37  
38 18 used to select respondents. Data were collected using a well-structured and pretested questionnaire. Pregnancy  
39  
40 19 test was done using HCG test. Bivariate and Multivariate logistic regression analysis was run to identify factors  
41  
42 20 associated with adolescent pregnancy.  
43  
44

45 21 Results: The prevalence of pregnancy among adolescent girls in the Nguenyiel refugee camp was 21.7% (95%  
46  
47 22 C.I: 17.6-25.6). Factors associated with adolescent pregnancy were age (17-19 years) (AOR: 2.79; 95% C.I:  
48  
49 23 1.55-5.05); Educational status: Primary education (AOR: 7.69; 95% C.I: 3.55-16.68); No formal education  
50  
51 24 (AOR: 3.42; 95% C.I: 1.59-7.36), and Household living arrangement: Living with none of biological parents  
52  
53 25 (AOR: 2.14; 95% C.I: 1.02-4.49); Living with either of a biological parent (AOR: 3.71; 95% C.I: 1.76-7.81).  
54  
55

56  
57 26 **Conclusions and Recommendations:** This study showed that there is a high prevalence of pregnancy among  
58  
59 27 adolescent girls in the study setting. Age (17-19 years), Educational status, and Household living arrangement  
60

1  
2  
3 28 (Live with none of the biological parents; Live with either of biological parents) were among the factors  
4  
5 29 significantly associated with adolescent pregnancy. Hence, health workers and other stakeholders in the camps  
6  
7 30 should focus on strengthening adolescent sexual health education giving especial attention to late adolescents,  
8  
9 31 uneducated and live without biological family.

11  
12 32 **Key words:** [Adolescents](#), [pregnancy](#), [Gambella](#), [Nguenyiel](#), [Refugee](#), [Ethiopia](#).

### 13 33 **INTRODUCTION**

14  
15  
16 34 Each year, an estimated 21 million adolescent girls become pregnant every year and approximately 12 million  
17  
18 35 of them give birth worldwide. At least 777,000 births occur to adolescent girls younger than 15 years in  
19  
20 36 developing countries. Adolescent pregnancy is associated with higher risks of Adverse Birth Outcomes such as  
21  
22 37 preterm birth, Low Birth Weight (LBW), Intra uterine growth retardation (IUGR), stillbirth, unsafe abortion,  
23  
24 38 maternal and neonatal mortality and morbidity compared with women in their twenties (1–9). Complications  
25  
26 39 from pregnancy and childbirth are the leading cause of death among adolescent girls(10,11). Moreover,  
27  
28 40 adolescent pregnancy is associated with social and economic problems like school drop-out, unemployment, and  
29  
30 41 limited future opportunities, risk of remaining poor and, and increased cost for health care (2,12).

31  
32  
33  
34  
35 42 Many teenage pregnancies in Ethiopia occur within marriage(13). Similarly, other studies showed that the  
36  
37 43 prevalence of pregnancy among adolescent girls in humanitarian settings (refugee camps or settlements) is 30%  
38  
39 44 higher than among their non-displaced counterparts (13, 14). This is due to the fact that adolescents in  
40  
41 45 humanitarian settings are extremely vulnerable to early sexual practice, violence, and exploitation or abuse  
42  
43 46 compared with their counterparts in general population (14–16). The experience of forced migration impacts  
44  
45 47 refugee adolescent girls' decision-making power related to their sexual relationships and reproductive life (9).  
46  
47 48 Hence, adolescents may lack the autonomy to determine over their affairs including their sexual and reproductive  
48  
49 49 health and rights (11,17). Adolescents are also the only age group for whom AIDS deaths are on the rise(10).

50  
51  
52  
53 50 According to the Ethiopian Demographic and health survey, the study area, Gambella Regional State of Ethiopia,  
54  
55 51 has high unmet need for family planning (23%), high polygamy practice (21%)(18) and highest HIV and other  
56  
57 52 STIs prevalence in the country in general population (13,17,19–21). However, there was no study conducted to  
58  
59 53 determine the prevalence and factors associated with pregnancy among adolescent refugees in humanitarian

1  
2  
3 54 settings. This study, therefore, aimed at assessing the prevalence of pregnancy among adolescent girls and  
4  
5 55 associated factors in the Nguenyiel refugee camp, Gambella region, Southwest Ethiopia.  
6  
7  
8

## 9 56 **METHODS AND MATERIALS**

### 10 11 12 57 **Study Design and Setting**

13  
14 58 A community-based cross-sectional study was conducted in the Nguenyiel refugee camp, Gambella region from  
15  
16 59 May 15 to June 15, 2021. The Gambella region hosted 337,081 refugee population from the bordering country  
17  
18 60 of South Sudan in 7 refugee camps (as of May 2021). The Nguenyiel refugee camp is the newest and the largest  
19  
20 61 camp in Ethiopia, opened to accommodate the new refugee influx from South Sudan following the escalation of  
21  
22 62 conflict in South Sudan in July 2016. It is located in Itang special woreda (district). It is found at about 769 km  
23  
24 63 away from capital Finfinnee/Addis Ababa and 55 Kms from the region's capital, Gambella town (22) (*See*  
25  
26  
27  
28 64 *figure 1*). It has 10,916 households and total populations of 90,506 with Male (43,757) and Female (46,747).  
29  
30

31 65 Adolescents constitute majority of the women in the Reproductive age in the camp  
32

### 33 66 **Population**

#### 34 35 67 **Source population**

36  
37  
38 68 The source populations were all adolescent girls (10-19 years) in the Nguenyiel refugee camp. The study  
39  
40 69 populations were adolescent girls in the selected households who participated on this study.  
41

#### 42 43 70 **Eligibility Criteria**

#### 44 45 71 **Inclusion criteria**

46  
47 72 All girls in the adolescence age interval (10-19) who were residents in the Nguenyiel refugee camp at least for  
48  
49 73 the last six months before the data collection were considered eligible.  
50

#### 51 74 **Sample size determination**

52  
53 75 The sample size was calculated for both objectives. For the first objective, sample size was calculated using a  
54  
55 76 single population proportion formula with the assumptions of:  $Z = 1.96$  at 95% confidence interval,  $d =$  Margin  
56  
57 77 of error assumed to be (0.05),  $P =$  prevalence of pregnancy in adolescent from previous studies (2), and 10%  
58  
59 78 non-response rate;  $n = Z\alpha_2p(1-p)/d^2 = 421$   
60

79 The sample size for the second objective was calculated by using the double population proportion formula using  
 80 Epi info version 3.0 statistical software by considering the following assumptions after reviewing previous  
 81 literature:  $Z_{\alpha/2}$ : 1.96 at 95% confidence level,  $Z_{\beta}$ : power = statistical power of 80%, P1: the probability of  
 82 outcome in the unexposed, P2: the probability of outcome in the exposed and r: ratio of unexposed to exposed  
 83 (Table 1).

84 Table 1: Sample size calculation based on the significant factors of adolescent pregnancy;  
 85 Nguenyiel refugee camp, Gambella region, southwest Ethiopia, 2021.

| S/no. | Significant factors associated with adolescent pregnancy & citations  | Power | 95% C.I | The proportion of pregnancy among non-exposed adolescent girls (P1) | The proportion of pregnancy among exposed (P2) | Risk Ratio (r) | AOR   | n <sub>1</sub> | n <sub>total</sub> |
|-------|-----------------------------------------------------------------------|-------|---------|---------------------------------------------------------------------|------------------------------------------------|----------------|-------|----------------|--------------------|
| 1     | Educational status [No formal education Vs. Secondary and above] (21) | 80%   | 1.96    | 31.0%                                                               | 7.4%                                           | 0.24           | 3.83  | 164            | 181                |
| 2     | Modern contraceptive use [Users Vs. Non-users] (17)                   | 80%   | 1.96    | 64.6%                                                               | 19.2%                                          | 0.29           | 10.62 | 131            | 144                |
| 3     | Marital status [Married Vs. Single (not-married)] (17)                | 80%   | 1.96    | 3.80%                                                               | 54.4%                                          | 14.3           | 2.16  | 33             | 37                 |

86 As shown in the above table, since the calculated sample sizes for the second objective are less than that of the  
 87 first objective (n = 421), finally, the larger sample size (n = 421) was taken and used for this study.

### 88 Sampling techniques and Procedures

89 The 421 respondents in the Nguenyiel refugee camp were chosen using a systematic random sampling  
 90 technique. In the Nguenyiel refugee camp, there were around 4100 adolescent girls (i.e., the source  
 91 population was 4100). To construct a sampling frame (i.e., to identify families with adolescent girls), a pre-  
 92 study survey was conducted. The sampling interval was calculated by dividing the number of adolescent girls  
 93 in the Nguenyiel refugee camp (N = 4100) by the sample size (n = 421), resulting in  $K = 4100/421 = 9$ . As a

1  
2  
3 94 result, every ninth household with adolescent was chosen. In case a house hold had two or more adolescents,  
4  
5 95 the lottery technique was employed to choose one adolescent girl.  
6  
7

## 8 96 Data collection Tools and Procedures

9  
10 97 The data was gathered by eight trained diploma nurses and two supervisors with a BSc in public health. A face-to-  
11  
12 98 face interviewer administered data collection method was employed using a well-structured questionnaire. The  
13  
14 99 questionnaire was adapted from different literature and pretested on sites other than the study area before the  
15  
16 100 commencement of actual data collection (13,21,23). It contained socio-demographic, family, and individual-  
17  
18 101 level characteristics, including sexual and reproductive health knowledge, modern contraceptive knowledge, and  
19  
20 102 other pregnancy-related characteristics. Pregnancy among adolescent girls was assessed by conducting a urine  
21  
22 103 Human Chorionic Gonadotropin (HCG) test at the community level using test kits. Before collecting a urine  
23  
24 104 sample, each study participant was asked if she had a confirmed pregnancy or if the pregnancy was apparently  
25  
26 105 visible to the data collectors at the time of data collection (interviews). Then, urine samples were collected from  
27  
28 106 all study participants except from those whose pregnancies were confirmed.  
29  
30

## 31 107 Data Quality control and Analysis

32 108 The questionnaire was first prepared in English and translated into the local language (Nuer); then, it was  
33  
34 109 translated back into English by a language expert to verify its consistency. Data collectors and supervisors were  
35  
36 110 provided a two-day training on the importance and objective of the study; data collection tools; sampling  
37  
38 111 methods; interviewing techniques; and important precautions and procedures to be followed while conducting  
39  
40 112 the HCG pregnancy test. The questionnaire was pretested on 5% of the sample size in places other than the study  
41  
42 113 area. The completeness and consistency of the data were checked by supervisors on a daily basis. After that, the  
43  
44 114 data was entered into Epidata software version 3.1 and exported to SPSS version 22. Frequencies and cross-  
45  
46 115 tabulations were used to check for missed values.  
47  
48

49 116 Descriptive analysis was done on socio-demographic, individual-level, and related characteristics and presented  
50  
51 117 using tables and graphs.  
52  
53

54 118 Bivariate and multivariate logistic regression analysis was done to identify factors associated with the outcome  
55  
56 119 variable. Accordingly, variables with a p-value < 0.25 on bi-variable logistic regression were taken as candidates  
57  
58 120 for multivariate analysis. The goodness of fit for the final regression model was checked by the Hosmer-  
59  
60



1  
2  
3 121 Lemeshow goodness of fit test at a p-value of > 0.05. On multivariate logistic regression analysis, variables with  
4  
5 122 a p-value of less than 0.05 at a 95% confidence level were declared significant. The adjusted odds ratio is used  
6  
7 123 to measure the strength of the association.  
8  
9

## 10 124 Patient and Public Involvement

11 125 No Patient and public involvement  
12  
13

## 14 15 126 RESULTS

### 16 17 127 Socio-Demographic Characteristics of Respondents

18 128 A total of 414 adolescent girls (10–19 years) participated in this study, making the response rate 98.3%. The  
19  
20 129 mean age of respondents was 16.8 years with  $\pm 1.52$  SD. The majority of respondents, 241 (58.2%) were late-  
21  
22 130 stage adolescents (17-19 years), and more than one-third of respondents, 164 (39.6%), were middle adolescent  
23  
24 131 girls (14-16 years), while 9 (2.2%) were in the early adolescence stage (10-13 years). Nearly three-fourths of  
25  
26 132 respondents, 309 (74.6%), were protestants, while 57 (13.8%) and 32 (7.7%) were Seventh-Day Adventist and  
27  
28 133 Church of God, respectively. More than half, 221 (53.4%) had primary and nearly one-third of respondents, 129  
29  
30 134 (31.1%), had no formal education. Three-fourths of adolescent girls, 313 (75.6%) were single (not married) and  
31  
32 135 101 (24.4%) were married or ever-married. The majority of married adolescents, 85 (84.2%), get married while  
33  
34 136 they are in their middle adolescence age (14-16 years); and one-fifth of marriages, 21 (20.8%), were arranged  
35  
36 137 marriages (Table 2).  
37  
38

39 138 **Table 2: Socio-demographic characteristics of respondents (adolescent girls, N=414) in**  
40 139 **Nguenyiel refugee camp, Gambella region, Southwest Ethiopia, September 2021.**

| 42 Variable                       | 43 Category                       | 44 Frequency | 45 Percent |
|-----------------------------------|-----------------------------------|--------------|------------|
| 46 <b>Age category by adolesc</b> | 47 Early adolescence (10-13 years | 9            | 2.20       |
|                                   | 48 Middle adolescence (14-16 yea  | 164          | 39.6       |
|                                   | 49 Late adolescence (17-19 years) | 241          | 58.2       |
| 50 <b>Religion</b>                | 51 Protestant                     | 309          | 74.6       |
|                                   | 52 Seventh-Day Adventist          | 57           | 13.8       |

---

|                                   |                                  |     |      |
|-----------------------------------|----------------------------------|-----|------|
|                                   | Church of God                    | 32  | 7.70 |
|                                   | Catholic                         | 16  | 3.90 |
| <b>Ethnicity</b>                  | Nuer                             | 414 | 100  |
| <b>Educational status</b>         | Secondary and above              | 64  | 15.5 |
|                                   | Primary education (grade 1-8)    | 221 | 53.4 |
|                                   | No formal education              | 129 | 31.1 |
| <b>Marital status</b>             | Single (Not married)             | 313 | 75.6 |
|                                   | Married and live together        | 79  | 19.1 |
|                                   | Married and separated            | 14  | 3.40 |
|                                   | Divorced                         | 8   | 1.90 |
| <b>Age at marriage by age</b>     | Married before 15 years          | 18  | 17.8 |
|                                   | Married between 15-19 years      | 83  | 82.2 |
| <b>Age at marriage by a stage</b> | Early adolescence (10-13 years)  | 1   | 0.90 |
|                                   | Middle adolescence (14-16 years) | 85  | 84.2 |
|                                   | Late adolescence (17-19 years)   | 15  | 14.9 |
| <b>Marriage arranged by</b>       | Yes                              | 21  | 20.8 |
|                                   | No                               | 80  | 79.2 |

---

140

### 141 **Family related - characteristics of respondents**

142 Only one hundred twenty-six (30.4%) of the study participants had communication with their parents on sexual  
 143 and reproductive health (SRH) issues, while more than two thirds of adolescent girls (288, 69.6%) had no  
 144 communication with their parents on the issues. Nearly half of adolescents, 194 (46.9%), live with either of their  
 145 biological parents (single parent). One-fourth, 104 (25.4%), live with none of their biological parents, and less  
 146 than one fifth of adolescents, 75 (18.1%), live with both biological parents. The mean family size in households  
 147 of the respondents was 6.32 people, with  $\pm 1.86$  SD and a range of 2–13. The majority of adolescent girls, 351  
 148 (84.8%), live in households with 5 or more people, three-fourths (75%) of whom live in large families of 7 or  
 149 more people (Table 3).

150 *Table 3: Familial-level characteristics of respondents in Nguenyiel Refugee Camp Gambella region,*  
 151 *Southwest Ethiopia, September 2021.*

| Variable                                             | Category                                   | Frequency | Percent |
|------------------------------------------------------|--------------------------------------------|-----------|---------|
| <b>Parent-adolescent communication on SRH issues</b> | Yes                                        | 126       | 30.4    |
|                                                      | No                                         | 288       | 69.6    |
| <b>Household living arrangement</b>                  | Live with both biological parents          | 75        | 18.1    |
|                                                      | Live with either of the biological parents | 194       | 46.9    |
|                                                      | Live with none of biological parent        | 104       | 25.4    |
|                                                      | Married (live together with husband)       | 40        | 9.60    |
| <b>Family size</b>                                   | Small family (4 persons and below)         | 63        | 15.2    |
|                                                      | Large family (5 and more persons)          | 351       | 84.8    |

152

### 153 **SRH characteristics of respondents**

154 The mean age at menarche (first menstrual bleeding) was 12.5 years with  $\pm 1.99$  SD. Menarche in almost all  
 155 respondents, 403 (99.5%), occurred between 10 and 14 years of age. The mean age at first sexual intercourse  
 156 among respondents was 14.03 years, with  $\pm 3.88$  SD. Almost half of the adolescent girls, 193 (49.6%), were  
 157 sexually active before 15 years; two-thirds of the respondents, 257 (66.0%), were sexually active in middle  
 158 adolescence (14–16 years); and 338 (86.9%) of adolescents had sexual intercourse before 18 years. The  
 159 contraceptive prevalence rate (CPR) among adolescent girls was 27 (6.5%). Out of these, 23 (5.6%) of

160 adolescents had ever used injectable (Depo-Provera and/or NET-EN); 26 (6.3%) used condoms, and 27 (6.5%)  
 161 of respondents used oral contraceptive pills (OCPs) (Table4).

162 Table 4: Sexual behaviour (characteristics) of respondents (adolescent girls, N=414) in Nguenyiel refugee  
 163 camp, Gambella region, Southwest Ethiopia, September 2021.

| Variable                                     | Category                          | Frequency |
|----------------------------------------------|-----------------------------------|-----------|
| Adolescent girl had menarche                 | Yes (Menarche occurred)           | 405       |
|                                              | No (Menarche not occurred)        | 9         |
| Sexual practice (N=414)                      | Yes (Ever had sexual intercourse) | 389       |
|                                              | No (Has not ever had sex )        | 25        |
| Age at sexual practice by age groups (N=389) | Sexually active before 15 years   | 193       |
|                                              | Sexually active at 15-19 years    | 196       |
| Age at sexual intercourse stages (N=389)     | Early adolescence (10-13 years)   | 64        |
|                                              | Middle adolescence (14-16 years)  | 257       |
|                                              | Late adolescence (17-19 years)    | 68        |
| Early sexual initiation (debut) (N=389)      | Yes                               | 338       |
|                                              | No                                | 51        |
| Modern contraceptive use (N=414)             | Yes                               | 27        |
|                                              | No                                | 387       |
| Ever used OCP (N=414)                        | Yes                               | 27        |
|                                              | No                                | 387       |

|                              |     |     |
|------------------------------|-----|-----|
| Ever used Injectable (N=414) | Yes | 23  |
|                              | No  | 391 |
| Ever used a condom (N=414)   | Yes | 26  |
|                              | No  | 388 |
| Ever used implant (N=414)    | Yes | 3   |
|                              | No  | 411 |
| Ever used SDM (N=414)        | Yes | 2   |
|                              | No  | 412 |
| Ever used IUCD (N=414)       | Yes | 5   |
|                              | No  | 409 |
| Female sterilization (N=414) | Yes | 0   |
|                              | No  | 414 |

164

### 165 Respondents Knowledge about contraceptive methods among

166 More than one-third of adolescent girls, 167 (40.3%), had poor knowledge of modern contraceptive methods;  
 167 118 (28.5%) and 129 (31.2%), respectively, had good and comprehensive knowledge of modern contraceptives.  
 168 The majority of respondents (326, 78.7%) knew or ever heard of Condom, 305 (73.7%) knew or ever heard of  
 169 oral contraceptive pills (OCP), more than half (218, 52.7%) knew or heard about injectable (Depo-Provera &  
 170 NET-EN), and 154 (37.2%) heard about implants (Table5).

171 Table 5: Knowledge of modern contraceptive methods among adolescent girls (N=414) in Nguenyiel refugee  
 172 camp, Gambella region, Southwest Ethiopia, September 2021.

| Variable                         | Category | Frequency (N=414) | Percent |
|----------------------------------|----------|-------------------|---------|
| <b>Knew or ever heard of OCP</b> | Yes      | 305               | 73.7    |

|                                          |                 |     |      |
|------------------------------------------|-----------------|-----|------|
|                                          | No              | 109 | 26.3 |
| <b>Knew or ever heard of injectable</b>  | Yes             | 218 | 52.7 |
|                                          | No              | 196 | 47.3 |
| <b>Knew or ever heard of a condom</b>    | Yes             | 326 | 78.7 |
|                                          | No              | 88  | 21.3 |
| <b>Knew or ever heard of implants</b>    | Yes             | 154 | 37.2 |
|                                          | No              | 260 | 62.8 |
| <b>Knew or ever heard of SDM</b>         | Yes             | 126 | 30.4 |
|                                          | No              | 288 | 69.6 |
| <b>Knew or ever heard of IUCD</b>        | Yes             | 126 | 30.4 |
|                                          | No              | 288 | 69.6 |
| <b>Knew or ever heard of sterilizati</b> | Yes             | 51  | 12.3 |
|                                          | No              | 363 | 87.7 |
| <b>Knowledge about contraceptive</b>     | Comprehensive k | 129 | 31.2 |
|                                          | Good knowledge  | 118 | 28.5 |
|                                          | Poor knowledge  | 167 | 40.3 |

173

### 174 Prevalence of adolescent pregnancy in Nguenyiel refugee camp, Gambella region

175 The prevalence of pregnancy among adolescent girls in the Nguenyiel refugee camp was 21.7% (95% C.I: 17.6-  
176 25-6). More than half of pregnant girls (51.1%) were middle adolescents (14–16 years) and 48.9% were late  
177 adolescents (17–19 years old) (*see figure 2*).

### 178 Factors associated with pregnancy among Adolescent

179 Age (17–19 years), educational status (no formal education, primary education), and family structure (living  
180 with either biological parent; living with neither biological parent) were statistically significantly associated with  
181 pregnancy among adolescent girls (10–19 years) in Nguenyiel refugee camp.

182 The odds of pregnancy among late adolescent girls (17-19 years) was 2.8 times higher compared with adolescents  
183 10-16 years of age (AOR: 2.8; 95% C.I: 1.6-5.1). Adolescent girls with primary education (grade 1–8) were 7.7  
184 times more likely to become pregnant compared with those with secondary and above (AOR: 7.7; 95% C.I: 3.55–

16.7). Similarly, the odds of pregnancy among adolescent girls with no formal education were 3.4 times higher compared with girls who attended secondary school and above (AOR: 3.4; 95% C.I: 1.6-7.4). Adolescent girls living with none of their biological parents (relative or may not be relative) were twice more likely to be pregnant compared with adolescents living with both biological parents (i.e., nuclear families) (AOR: 2.1; 95% C.I: 1.02-4.5). Likewise, the odds of pregnancy among adolescent girls living with either of their biological parents was 3.7 times higher compared with girls living with both of their biological parents (AOR: 3.7; 95% C.I: 1.8–7.8) (Table 6).

Table 6: Factors associated with pregnancy among adolescent girls (10-19 years) in Nguenyiel refugee camp, Gambella region, Southwest Ethiopia, September 2021.

| Variable                                 | Categories                                 | Pregnancy (status) |                   | AOR (95% C.I)          | P-value      |
|------------------------------------------|--------------------------------------------|--------------------|-------------------|------------------------|--------------|
|                                          |                                            | Yes (HCG positive) | No(HCGnegative)   |                        |              |
|                                          |                                            | N (%)              | N (%)             |                        |              |
| Age (stages of adolescence)              | 10-16 years                                | 46 (51.1)          | 127 (39.2)        | 1                      |              |
|                                          | <b>17-19 years</b>                         | <b>44 (48.9)</b>   | <b>197 (60.8)</b> | <b>2.79 (1.6-4.8)</b>  | <b>0.001</b> |
| Educational status                       | Secondary and above                        | 26 (28.9)          | 38 (11.7)         | 1                      |              |
|                                          | <b>Primary education (1-8)</b>             | <b>26 (28.9)</b>   | <b>195 (60.2)</b> | <b>7.69 (3.7-16.1)</b> | <b>0.001</b> |
|                                          | <b>No formal education</b>                 | <b>38 (42.2)</b>   | <b>91 (28.1)</b>  | <b>3.42 (1.6-7.4)</b>  | <b>0.002</b> |
| Sexual experience                        | Sexually active <18 years old              | 54 (60.0)          | 142 (47.5)        | 1                      |              |
|                                          | Sexually active ≥18 years of age           | 36 (40.0)          | 157 (52.5)        | 1.39 (0.7-2.5)         | 0.282        |
| Knowledge about contraceptive use        | Comprehensive knowledge                    | 37 (41.1)          | 92 (28.4)         | 1                      |              |
|                                          | Good knowledge                             | 20 (22.2)          | 98 (30.2)         | 1.29 (0.6-2.5)         | 0.496        |
|                                          | Poor knowledge                             | 33 (36.7)          | 134 (41.4)        | 1.73 (0.9-3.3)         | 0.100        |
| Early sexual debut (before 18 years)     | No                                         | 6 (11.8)           | 84 (24.9)         | 1                      |              |
|                                          | Yes                                        | 45 (88.2)          | 254 (75.1)        | 0.41 (0.2-0.8)         | 0.096        |
| Parent-adolescent communication on (SRH) | Yes                                        | 40 (44.4)          | 86 (26.5)         | 1                      |              |
|                                          | No                                         | 50 (55.6)          | 238 (73.5)        | 1.37 (0.7-2.5)         | 0.326        |
| Household living arrangement             | Live with both biological parents          | 29 (32.2)          | 46 (14.2)         | 1                      |              |
|                                          | <b>Live with one biological parent</b>     | <b>23 (25.6)</b>   | <b>171 (52.8)</b> | <b>3.71 (1.8-7.8)</b>  | <b>0.001</b> |
|                                          | <b>Live with neither biological parent</b> | <b>25 (27.8)</b>   | <b>80 (24.7)</b>  | <b>2.14 (1.0-4.5)</b>  | <b>0.043</b> |
|                                          | Married and living with husband            | 13 (14.4)          | 27 (8.30)         | 2.04 (0.8-5.0)         | 0.132        |

194

## DISCUSSIONS

This study showed that the prevalence of pregnancy among adolescent girls (10–19 years) in the Nguenyiel refugee camp was 21.7%. This finding is consistent with findings of similar studies conducted among South Sudanese refugees (10–19 years) in the Bidibidi refugee settlement, northern Uganda (25%)(3), Eritrean refugees in the northern Tigray region, Ethiopia (28.4%) (24), Somalian refugees in Kobe refugee camp of Somali region, Ethiopia (26.3%) (25), and among refugees in Thailand-Myanmar border settlement, South-east Asia (26).

The observed similarity could be due to similar socio-demographic and socioeconomic characteristics in humanitarian settings as well as similarity in the vulnerability of adolescent girls to SRH problems in humanitarian settings.

The findings of this study are higher than the findings of similar studies among adolescent girls in non-emergency (non-humanitarian) settings: in Africa (a pooled prevalence of 18.8%)(27), Arba Minch town, Southern Ethiopia (7.7%)(28), Gambella region of Ethiopia (16.2%) and India (10%) (29).

The possible reasons for the difference in the prevalence of adolescent pregnancy in humanitarian settings compared with non-emergency contexts could be due to differences in settings. That is, adolescents in humanitarian settings are more vulnerable to poor socio-economic status following the disruption of family structure, loss of father or mother, or both, during conflict or disaster.

This in turn leads adolescents to hopelessness, being prone to gender-based violence and early marriage. In addition to that, basic reproductive health care services like family planning, including health information communication on reproductive issues, are less available in humanitarian settings than in non-humanitarian settings.

On the other hand, the finding of this study is lower than that of studies conducted in: Nigeria (45.4%)(30), Eastern Ethiopia, (30.2%)(31), East Africa (pooled prevalence of 54.6%)(32), Uganda (35.8%)(33) and north east Ethiopia (28.6%)(34). The possible explanation for this discrepancy could be difference in socio-demographic, socio-economic, larger sample size and inclusion terminated pregnancy in the case of East Africa pooled prevalence.



1  
2  
3 221 This study showed that pregnancy among refugee adolescents was associated with increasing age; the odds of  
4  
5 222 pregnancy among late adolescent girls (17–19 years) was 2.8 times higher than girls in the early and middle  
6  
7 223 stages of adolescence (10–16 years). This is in line with studies conducted in Eastern Ethiopia, East Africa,  
8  
9 224 Northeast Ethiopia, and Kenya. (31,32,34,35). This could be due to the fact that as age increases, teenagers will  
10  
11 225 have more exposure to sex and their chance of getting married also increase.

12  
13  
14 226 Adolescent girls with primary education (grade 1-8) were 7.7 times more likely to become pregnant compared  
15  
16 227 with their counterparts who attended secondary and above. Likewise, the odds of pregnancy among adolescents  
17  
18 228 with no formal education was 3.4 times as high compared with girls who attained secondary and above.

19  
20  
21 229 This is similar with finding of studies conducted in Eastern Ethiopia (36), South East Nigeria(30), a systematic  
22  
23 230 review and Meta-analysis in Africa (27), a multi-level analysis in five East African countries(37).The possible  
24  
25 231 justification could be adolescent girls with lower educational attainment lack appropriate information regarding  
26  
27 232 the consequence of unsafe sexual practice as well as the means to avoid unwanted pregnancy.

28  
29  
30  
31 233 This study showed that household living arrangements (family structure) were associated with adolescent  
32  
33 234 pregnancy: Adolescent girls living with none of their biological parents were twice more likely to be pregnant  
34  
35 235 compared with adolescents living with both biological parents (i.e., living in nuclear families). The odds of  
36  
37 236 pregnancy among adolescent girls living with either of their biological parents (single parent families) was 3.7  
38  
39 237 times higher compared with girls living with both of their biological parents. This is similar to the findings of  
40  
41 238 studies conducted in Southern Ethiopia (28), eastern Ethiopia(31) and north east Ethiopia (34). This could be  
42  
43 239 because adolescent girls who did not live with one or both of their biological parents lack parental support and  
44  
45 240 guidance. Adolescent girls might have lost one or both of their biological parents during the conflict. Adolescents  
46  
47 241 in this situation may feel helpless and hopeless and choose to get married or engage in unsafe sex to secure their  
48  
49 242 survival.

## 50 51 52 243 **STRENGTH AND LIMITATION OF THE STUDY**

### 53 54 244 **Strength**

55 245 Conducting community based study, using primary data including collecting urine samples directly from study  
56  
57 246 participants in the humanitarian settings is strength.

### 247 *Limitation of the study*

248 This study mainly focused on pregnancy among adolescents and factors associated with it. Underlying causes  
249 like level of unmet need for family planning, and unwanted pregnancy are not addressed in this study.

250 HCG Test cannot detect a pregnancy that is less than a week. Therefore, the prevalence of pregnancy among  
251 adolescent girls identified by this study among study participants might be higher than the one reported by this  
252 study.

### 253 *CONCLUSIONS*

254 This study showed a high prevalence of pregnancy among refugee adolescent girls (10–19 years) in the  
255 Nguenyiel refugee camp, Gambella region, Ethiopia. The significant factors associated with adolescent  
256 pregnancy were: Age (17–19 years), educational status (no formal education; primary education), and household  
257 living arrangement or family structure: Live with none of the biological parents; live with either of the biological  
258 parents.

### 259 *Recommendation*

#### 260 *Health Care Provider*

261 Health workers in the camps should work to strengthen targeted adolescent sexual health education  
262 and information, giving special attention to the uneducated, those living without biological family,  
263 and late adolescents.

#### 264 *Humanitarian organizations (MS, ARRA, UNHCR, etc.)*

265 Strengthen adolescent-youth-friendly services and adolescent girls' empowerment in refugee camps.

266 Strengthen health education and schooling for refugee adolescent girls.

267 strengthen comprehensive sexuality education (CSE) programs at schools in refugee camps.

268 Adolescent girls who have lost their parents should be given special attention.

#### 269 *Regional Health Bureaus, Zonal and other Health Offices*

270 Strengthening intervention programs aimed at preventing pregnancy among refugee adolescents.

271 Prepare programs and strategies (approaches) to support refugee adolescent girls living with none or either of  
272 their biological parents

1  
2  
3 273 **Researchers**

4 274 Future researchers should focus on exploring the underlying socio-cultural conditions through a mixed approach  
5  
6  
7 275 (qualitative and quantitative study).  
8

9 276 Important points that are not addressed in this study, like the level of unmet need for family planning and the  
10  
11 277 prevalence of unwanted pregnancy, are among the issues that seek the attention of future researchers.  
12

13 278 *Consent to publish*

14 279 Not applicable.  
15

16 280 *Availability of data and materials*

17 281 All the data used or mentioned in this research are available  
18

19 282 *Competing interests*

20 283 The authors declare that they have no competing interests.  
21

22 284 *Funding*

23 285 The authors declare that no financial support in the research, authorship, and publication of this article was  
24  
25 286 received  
26

27 287 *Author's contribution*

28 288 All authors made a significant contribution to the work reported, whether that is in the conception, study design,  
29  
30 289 execution, acquisition of data, analysis and interpretation, or in all these areas; took part in drafting, revising, or  
31  
32 290 critically reviewing the article; gave final approval of the version to be published; have agreed on the journal to  
33  
34 291 which the article has been submitted; and agree to be accountable for all aspects of the work  
35  
36

37 292 *Acknowledgement*

38 293 We would like to acknowledge Mettu University for financial support. We are also grateful to the data collectors  
39  
40 294 and respondents who took part in this study.  
41

42 295 *Abbreviations and Acronyms*

|        |       |                                                  |
|--------|-------|--------------------------------------------------|
| 43 296 | ASRH  | Adolescent Sexual And Reproductive Health        |
| 44     |       |                                                  |
| 45 297 | ARRA  | Administration For Refugees And Returnees Affair |
| 46     |       |                                                  |
| 47     |       |                                                  |
| 48 298 | HCG   | Human Chorionic Gonadotropins                    |
| 49     |       |                                                  |
| 50 299 | IUGR  | Intra-Uterine Growth Restriction                 |
| 51     |       |                                                  |
| 52 300 | LBW   | Low-Birth Weight                                 |
| 53     |       |                                                  |
| 54 301 | OCP   | Oral Contraceptive Pills                         |
| 55     |       |                                                  |
| 56     |       |                                                  |
| 57 302 | LMICs | Low And Middle-Income Countries                  |
| 58     |       |                                                  |
| 59 303 | SSA   | Sub-Sahara Africa                                |
| 60     |       |                                                  |

|     |     |                                 |
|-----|-----|---------------------------------|
| 304 | SDM | Standard Day Method             |
| 305 | SRH | Sexual And Reproductive Health; |
| 306 | RC  | Refugee Camp                    |

## Declarations

### Ethics approval and consent to participate

This study was done according to the Declaration of Helsinki.

Research Ethical Committee of Mettu University provided Ethical approval for this study with reference number: RPG/03/2013. The Gambella Regional Health Bureau and ARRA, Gambella Zonal office provided a formal letter of permission. Data collectors were trained on how to handle confidential and private participant information.

Confidentiality was assured by excluding participants' names from the data collection tools. The study purpose, procedure, and duration were clearly explained to study participants. Study participants engaged in the study were informed that they could skip any question they didn't want to respond to and could quit the interview if they felt discomfort. Then consent was obtained from the study participants who were 18 years of age or older. For those who were less than 18 years, assent was taken from the participants but consent was taken from their representatives based on article 25 of the Declaration of Helsinki.

## References

1. Kawakita T, Wilson K, Grantz KL, Landy HJ, Huang CC, Gomez-Lobo V. Adverse Maternal and Neonatal Outcomes in Adolescent Pregnancy. *J Pediatr Adolesc Gynecol*. 2016;29(2):130–6.
2. Nguyen PH, Sanghvi T, Tran LM, Afsana K, Mahmud Z, Aktar B, et al. The nutrition and health risks faced by pregnant adolescents: Insights from a cross-sectional study in Bangladesh. *PLoS One*. 2017;12(6):1–13.
3. Bakesiima R, Clevee A, Larsson E, Tumwine JK, Ndeezi G, Danielsson KG, et al. Modern contraceptive use among female refugee adolescents in northern Uganda: Prevalence and associated factors. *Reprod Health*. 2020;17(1):1–9.
4. Nove A, Matthews Z, Neal S, Camacho AV. Maternal mortality in adolescents compared with women of other ages: Evidence from 144 countries. *Lancet Glob Heal*. 2014;2(3):e155–64.
5. Parker AL, Parker DM, Zan BN, Min AM, Gilder ME, Ringringulu M, et al. Trends and birth outcomes in adolescent refugees and migrants on the Thailand-Myanmar border , 1986-2016 : an observational study [ version 1 ; referees : awaiting peer review ]. 2018;(May).

- 1  
2  
3 336 6. Zhang T, Wang H, Wang X, Yang Y, Zhang Y, Tang Z, et al. The adverse maternal and  
4 337 perinatal outcomes of adolescent pregnancy: A cross sectional study in Hebei, China. *BMC*  
5 338 *Pregnancy Childbirth*. 2020;20(1):1–10.  
6  
7 339 7. World Health Organization Regional Office for South-East Asia. Adolescent Pregnancy  
8 340 Situation in South-East Asia Region. *Media Cent*. 2015;1–194.  
9  
10 341 8. Johnson W, Moore SE. Adolescent pregnancy, nutrition, and health outcomes in low- and  
11 342 middle-income countries: what we know and what we don't know. Vol. 123, *BJOG: An*  
12 343 *International Journal of Obstetrics and Gynaecology*. 2016. p. 1589–92.  
13  
14 344 9. Indarti J, Al Fattah AN, Dewi Z, Hasani RDK, Mahdi FAN, Surya R. Teenage Pregnancy:  
15 345 Obstetric and Perinatal Outcome in a Tertiary Centre in Indonesia. *Obstet Gynecol Int*.  
16 346 2020;2020.  
17  
18 347 10. Adolescent health and well-being | UNICEF [Internet]. [cited 2022 Jan 3]. Available from:  
19 348 <https://www.unicef.org/health/adolescent-health-and-well-being>  
20  
21 349 11. Adolescent pregnancy [Internet]. [cited 2022 Jan 3]. Available from:  
22 350 <https://www.who.int/news-room/fact-sheets/detail/adolescent-pregnancy>  
23  
24 351 12. Mekonnen T, Dune T, Perz J. Maternal health service utilisation of adolescent women in sub-  
25 352 Saharan Africa: A systematic scoping review. *BMC Pregnancy Childbirth*. 2019;19(1).  
26  
27 353 13. EDHS 2016 Team. Ethiopian Demographic and Health Survey. Report. 2016;  
28  
29 354 14. Morris JL, Rushwan H. Adolescent sexual and reproductive health: The global challenges.  
30 355 2015; Available from: <http://dx.doi.org/10.1016/j.ijgo.2015.02.006>  
31  
32 356 15. Kerner B, Manohar S, Mazzacurati C, Tanabe M. Adolescent Sexual and Reproductive Health  
33 357 in Humanitarian Settings [Internet]. Vol. 40, *Forced Migration Review*. 2012. 21–22 p.  
34 358 Available from: <http://www.fmreview.org/young-and-out-of-place>  
35  
36 359 16. Neal S, Mahendra S, Bose K, Camacho AV, Mathai M, Nove A, et al. The causes of maternal  
37 360 mortality in adolescents in low and middle income countries: Systematic review of the  
38 361 literature. *BMC Pregnancy Childbirth*. 2016;16(1):1–18.  
39  
40 362 17. Adolescent pregnancy | United Nations Population Fund [Internet]. [cited 2022 Jan 3].  
41 363 Available from: <https://www.unfpa.org/adolescent-pregnancy>  
42  
43 364 18. Tadesse A, Geda A. Why Syphilis Infection is High Among Pregnant Women in Refugee  
44 365 Camps ? A Case in Ethiopia. 2022;(March):481–9.  
45  
46 366 19. Kibret GD, Ferede A, Leshargie CT, Wagnew F, Ketema DB, Alebel A. Trends and spatial  
47 367 distributions of HIV prevalence in Ethiopia. *Infect Dis Poverty* [Internet]. 2019 Oct 17 [cited  
48 368 2022 Jan 4];8(1):1–9. Available from:  
49 369 <https://idpjournal.biomedcentral.com/articles/10.1186/s40249-019-0594-9>  
50  
51 370 20. Central Statistical Agency Addis Ababa E. UNICEF Ethiopia. Ethiopia Demographic and  
52 371 Health Survey. Addis Ababa, Ethiopia, and Rockville, Maryland, USA: CSA and ICF.. Addis  
53 372 Ababa, Ethiopia, and Rockville, Maryland, USA: CSA and ICF. 2016. 249 p.  
54  
55 373 21. Ethiopian Public Health Institute (EPHI), ICF. Ethiopia Mini Demographic and Health Survey  
56 374 2019: Final Report [Internet]. 2021. 1–207 p. Available from:  
57 375 <https://dhsprogram.com/pubs/pdf/FR363/FR363.pdf>  
58  
59 376 22. UNHCR. Nguenyiel refugee camp. 2020;(March). Available from:  
60 377 <https://reliefweb.int/sites/reliefweb.int/files/resources/77009.pdf>

- 1  
2  
3 378 23. Nguyen PH, Sanghvi T, Tran LM, Afsana K, Mahmud Z, Aktar B, et al. The nutrition and  
4 379 health risks faced by pregnant adolescents: Insights from a cross-sectional study in  
5 380 Bangladesh. *PLoS One* [Internet]. 2017 Jun 1 [cited 2022 May 6];12(6):e0178878. Available  
6 381 from: <https://journals.plos.org/plosone/article?id=10.1371/journal.pone.0178878>
- 8 382 24. Gebrecherkos K, Gebremariam B, Gebeyehu A, Siyum H, Kahsay G, Abay M. Unmet need for  
9 383 modern contraception and associated factors among reproductive age group women in Eritrean  
10 384 refugee camps, Tigray, north Ethiopia: A cross-sectional study *11 Medical and Health  
11 385 Sciences 1117 Public Health and Health Services 11 Medical and H. BMC Res Notes  
12 386* [Internet]. 2018;11(1):1–6. Available from: <https://doi.org/10.1186/s13104-018-3956-7>
- 14 387 25. Elnakib S, Hunersen K, Metzler J, Bekele H, Robinson WC. Child marriage among Somali  
15 388 refugees in Ethiopia: a cross sectional survey of adolescent girls and adult women. *BMC  
16 389 Public Health*. 2021;21(1):1–12.
- 18 390 26. Parker AL, Parker DM, Zan BN, Min AM, Gilder ME, Ringringulu M, et al. Trends and birth  
19 391 outcomes in adolescent refugees and migrants on the Thailand-Myanmar border, 1986-2016:  
20 392 An observational study [version 1; referees: 2 approved]. *Wellcome Open Res*. 2018;3(0).
- 22 393 27. Kassa GM, Arowojolu AO, Odukogbe AA, Yalew AW. Prevalence and determinants of  
23 394 adolescent pregnancy in Africa: a systematic review and Meta-analysis. *Reprod Health  
24 395* [Internet]. 2018 Nov 29 [cited 2022 Mar 9];15(1). Available from:  
25 396 [/pmc/articles/PMC6267053/](https://pubmed.ncbi.nlm.nih.gov/3267053/)
- 27 397 28. Mathewos S, Mekuria A. Teenage Pregnancy and Its Associated Factors among School  
28 398 Adolescents of Arba Minch Town, Southern Ethiopia. *Ethiop J Health Sci* [Internet]. 2018  
29 399 May 18 [cited 2022 Mar 9];28(3):287–98. Available from:  
30 400 <https://www.ajol.info/index.php/ejhs/article/view/171332>
- 32 401 29. Mahavarkar SH, Madhu CK, Mule VD. A comparative study of teenage pregnancy.  
33 402 <http://dx.doi.org/10.1080/01443610802281831> [Internet]. 2009 Aug [cited 2022 Mar  
34 403 9];28(6):604–7. Available from:  
35 404 <https://www.tandfonline.com/doi/abs/10.1080/01443610802281831>
- 37 405 30. Uwaezuoke AI, Uzochukwu BS, Nwagbo DF, Onwujekwe OE. Determinants of Teenage  
38 406 Pregnancy in Rural Communities of Abia State, South East Nigeria. *Int J Med Heal Dev  
39 407* [Internet]. 2004 Jun 18 [cited 2022 Mar 9];9(1):28–33. Available from:  
40 408 <https://www.ajol.info/index.php/jcm/article/view/10471>
- 42 409 31. Mezmur H, Assefa N, Alemayehu T. Teenage pregnancy and its associated factors in eastern  
43 410 ethiopia: A community-based study. *Int J Womens Health*. 2021;13:267–78.
- 45 411 32. Worku MG, Tessema ZT, Teshale AB, Tesema GA, Yeshaw Y. Prevalence and associated  
46 412 factors of adolescent pregnancy (15–19 years) in East Africa: a multilevel analysis. *BMC  
47 413 Pregnancy Childbirth*. 2021;21(1):1–8.
- 49 414 33. Council T, District K, Sectional AC. Primary Health Care : Open Access Factors Associated  
50 415 with Teenage Pregnancy and its Effects in Kibuku. 2018;8(2).
- 52 416 34. Habitu YA, Yalew A, Bisetegn TA. Prevalence and Factors Associated with Teenage  
53 417 Pregnancy, Northeast Ethiopia, 2017: A Cross-Sectional Study. *J Pregnancy* [Internet]. 2018  
54 418 [cited 2022 Mar 10];2018. Available from: [/pmc/articles/PMC6236922/](https://pubmed.ncbi.nlm.nih.gov/3236922/)
- 56 419 35. Omoro T, Gray SC, Otieno G, Mbeda C, Phillips-Howard PA, Hayes T, et al. Teen pregnancy  
57 420 in rural western Kenya: a public health issue. <http://mc.manuscriptcentral.com/rady> [Internet].  
58 421 2017 Oct 2 [cited 2022 Mar 9];23(4):399–408. Available from:  
59 422 <https://www.tandfonline.com/doi/abs/10.1080/02673843.2017.1402794>

- 1  
2  
3 423 36. Mezmur H, Assefa N, Alemayehu T. Teenage Pregnancy and Its Associated Factors in Eastern  
4 424 Ethiopia: A Community-Based Study. 2021 [cited 2022 Mar 9]; Available from:  
5 425 <http://doi.org/10.2147/IJWH.S287715>  
6  
7 426 37. Wado YD, Sully EA, Mumah JN. Pregnancy and early motherhood among adolescents in five  
8 427 East African countries: A multi-level analysis of risk and protective factors. BMC Pregnancy  
9 428 Childbirth. 2019;19(1):1–11.

10  
11 429

12  
13 430 **Figure 1:** Map of Nguenyiel refugee camp, Gambella, Ethiopia.

14  
15 431 Source: [nguenyiel refugee camp map - Bing](#)

16  
17 432

18  
19  
20 433 **Figure 2:** Prevalence of Adolescent pregnancy in humanitarians setting (in Nguenyiel refugee camp)

21  
22  
23 434  
24  
25  
26  
27  
28  
29  
30  
31  
32  
33  
34  
35  
36  
37  
38  
39  
40  
41  
42  
43  
44  
45  
46  
47  
48  
49  
50  
51  
52  
53  
54  
55  
56  
57  
58  
59  
60

1  
2  
3 Map of Nguenyyiel refugee Camp  
4  
5

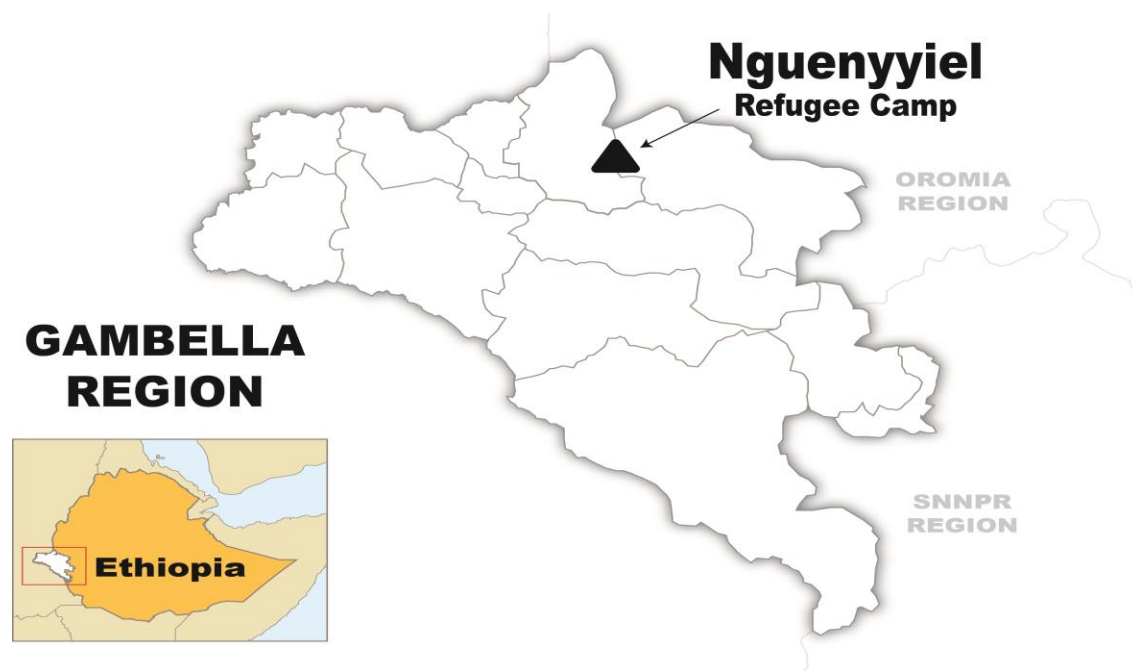

28 Figure 1. Map of Nguenyyiel refugee Camp, Gambella, Ethiopia.

29  
30 Source: [nguennyiel refugee camp map - Bing](#)  
31  
32  
33  
34  
35  
36  
37  
38  
39  
40  
41  
42  
43  
44  
45  
46  
47  
48  
49  
50  
51  
52  
53  
54  
55  
56  
57  
58  
59  
60



## Pregnancy among Adolescent girls in humanitarian setting

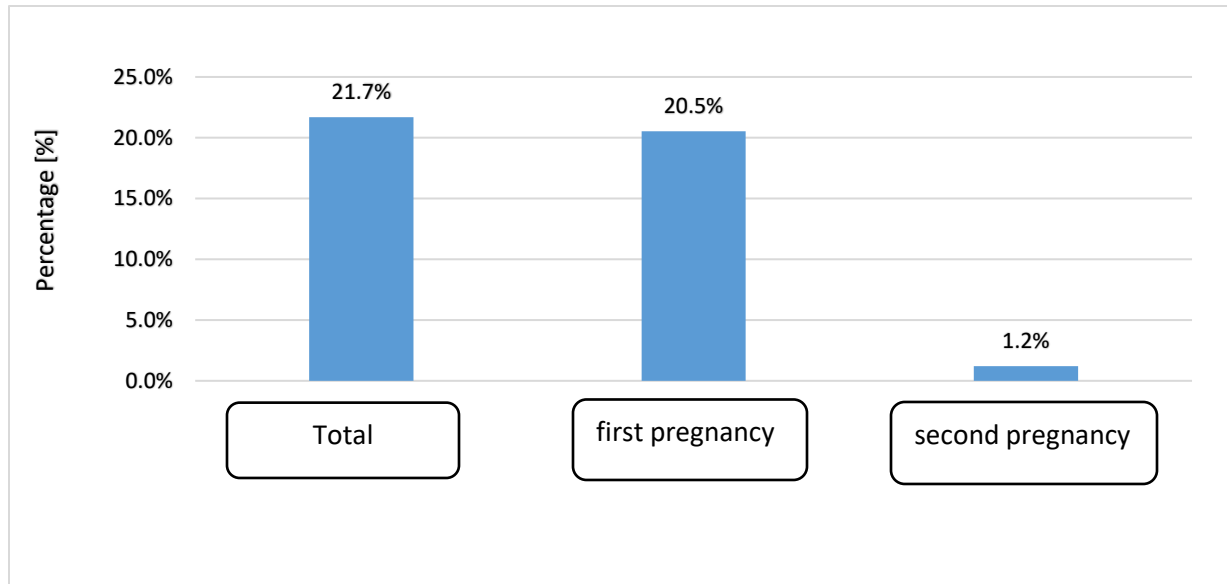

Figure 2: Prevalence of pregnancy among adolescent girls (10-19 years) in Nguenyiel refugee camp, Gambella region, South-west Ethiopia, September 2021.

STROBE Statement—Checklist of items that should be included in reports of *cross-sectional studies*

|                              | Item No | Recommendation                                                                                                                                                                                               | Page No |
|------------------------------|---------|--------------------------------------------------------------------------------------------------------------------------------------------------------------------------------------------------------------|---------|
| <b>Title and abstract</b>    | 1       | (a) Indicate the study's design with a commonly used term in the title or the abstract                                                                                                                       | 1       |
|                              |         | (b) Provide in the abstract an informative and balanced summary of what was done and what was found                                                                                                          | 1-2     |
| <b>Introduction</b>          |         |                                                                                                                                                                                                              |         |
| Background/rationale         | 2       | Explain the scientific background and rationale for the investigation being reported                                                                                                                         | 2-3     |
| Objectives                   | 3       | State specific objectives, including any prespecified hypotheses                                                                                                                                             | 1       |
| <b>Methods</b>               |         |                                                                                                                                                                                                              |         |
| Study design                 | 4       | Present key elements of study design early in the paper                                                                                                                                                      | 3       |
| Setting                      | 5       | Describe the setting, locations, and relevant dates, including periods of recruitment, exposure, follow-up, and data collection                                                                              | 3-5     |
| Participants                 | 6       | (a) Give the eligibility criteria, and the sources and methods of selection of participants                                                                                                                  | 4,6     |
| Variables                    | 7       | Clearly define all outcomes, exposures, predictors, potential confounders, and effect modifiers. Give diagnostic criteria, if applicable                                                                     | 6       |
| Data sources/<br>measurement | 8*      | For each variable of interest, give sources of data and details of methods of assessment (measurement). Describe comparability of assessment methods if there is more than one group                         | 6       |
| Bias                         | 9       | Describe any efforts to address potential sources of bias                                                                                                                                                    | 6       |
| Study size                   | 10      | Explain how the study size was arrived at                                                                                                                                                                    | 4-5     |
| Quantitative variables       | 11      | Explain how quantitative variables were handled in the analyses. If applicable, describe which groupings were chosen and why                                                                                 | 6       |
| Statistical methods          | 12      | (a) Describe all statistical methods, including those used to control for confounding                                                                                                                        | 6       |
|                              |         | (b) Describe any methods used to examine subgroups and interactions                                                                                                                                          | 6       |
|                              |         | (c) Explain how missing data were addressed                                                                                                                                                                  | 6       |
|                              |         | (d) If applicable, describe analytical methods taking account of sampling strategy                                                                                                                           | 6       |
|                              |         | (e) Describe any sensitivity analyses                                                                                                                                                                        |         |
| <b>Results</b>               |         |                                                                                                                                                                                                              |         |
| Participants                 | 13*     | (a) Report numbers of individuals at each stage of study—eg numbers potentially eligible, examined for eligibility, confirmed eligible, included in the study, completing follow-up, and analysed            | 4,6     |
|                              |         | (b) Give reasons for non-participation at each stage                                                                                                                                                         | NA      |
|                              |         | (c) Consider use of a flow diagram                                                                                                                                                                           |         |
| Descriptive data             | 14*     | (a) Give characteristics of study participants (eg demographic, clinical, social) and information on exposures and potential confounders                                                                     | 6       |
|                              |         | (b) Indicate number of participants with missing data for each variable of interest                                                                                                                          | 4,5,7   |
| Outcome data                 | 15*     | Report numbers of outcome events or summary measures                                                                                                                                                         | 7       |
| Main results                 | 16      | (a) Give unadjusted estimates and, if applicable, confounder-adjusted estimates and their precision (eg, 95% confidence interval). Make clear which confounders were adjusted for and why they were included |         |

|                          |    |                                                                                                                                                                            |           |
|--------------------------|----|----------------------------------------------------------------------------------------------------------------------------------------------------------------------------|-----------|
|                          |    | (b) Report category boundaries when continuous variables were categorized                                                                                                  | NA        |
|                          |    | (c) If relevant, consider translating estimates of relative risk into absolute risk for a meaningful time period                                                           | NA        |
| Other analyses           | 17 | Report other analyses done—eg analyses of subgroups and interactions, and sensitivity analyses                                                                             | 7         |
| <b>Discussion</b>        |    |                                                                                                                                                                            |           |
| Key results              | 18 | Summarise key results with reference to study objectives                                                                                                                   | 12, 13,17 |
| Limitations              | 19 | Discuss limitations of the study, taking into account sources of potential bias or imprecision. Discuss both direction and magnitude of any potential bias                 | 16        |
| Interpretation           | 20 | Give a cautious overall interpretation of results considering objectives, limitations, multiplicity of analyses, results from similar studies, and other relevant evidence | 16        |
| Generalisability         | 21 | Discuss the generalisability (external validity) of the study results                                                                                                      | 16        |
| <b>Other information</b> |    |                                                                                                                                                                            |           |
| Funding                  | 22 | Give the source of funding and the role of the funders for the present study and, if applicable, for the original study on which the present article is based              | 18        |

\*Give information separately for exposed and unexposed groups.

**Note:** An Explanation and Elaboration article discusses each checklist item and gives methodological background and published examples of transparent reporting. The STROBE checklist is best used in conjunction with this article (freely available on the Web sites of PLoS Medicine at <http://www.plosmedicine.org/>, Annals of Internal Medicine at <http://www.annals.org/>, and Epidemiology at <http://www.epidem.com/>). Information on the STROBE Initiative is available at [www.strobe-statement.org](http://www.strobe-statement.org).

# BMJ Open

**Pregnancy among Adolescents Girls in Humanitarian settings: A case in Refugee Camp of Gambella Regional state, Community Based Cross-Sectional Study, Southwest Ethiopia, 2021**

|                                 |                                                                                                                                                                                                      |
|---------------------------------|------------------------------------------------------------------------------------------------------------------------------------------------------------------------------------------------------|
| Journal:                        | <i>BMJ Open</i>                                                                                                                                                                                      |
| Manuscript ID                   | bmjopen-2022-064732.R1                                                                                                                                                                               |
| Article Type:                   | Original research                                                                                                                                                                                    |
| Date Submitted by the Author:   | 08-Sep-2022                                                                                                                                                                                          |
| Complete List of Authors:       | Bol, Koang Nyak; World Health Organization, PRSEAH Program Negera, Ebissa; Mettu University, Public Health Gedefa, Abdi; Mettu University, Public Health Department; Jimma University, Family Health |
| <b>Primary Subject Heading</b>: | Reproductive medicine                                                                                                                                                                                |
| Secondary Subject Heading:      | Public health                                                                                                                                                                                        |
| Keywords:                       | Reproductive medicine < GYNAECOLOGY, Public health < INFECTIOUS DISEASES, Maternal medicine < OBSTETRICS, SEXUAL MEDICINE                                                                            |
|                                 |                                                                                                                                                                                                      |

SCHOLARONE™  
Manuscripts

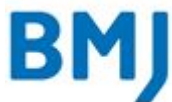

I, the Submitting Author has the right to grant and does grant on behalf of all authors of the Work (as defined in the below author licence), an exclusive licence and/or a non-exclusive licence for contributions from authors who are: i) UK Crown employees; ii) where BMJ has agreed a CC-BY licence shall apply, and/or iii) in accordance with the terms applicable for US Federal Government officers or employees acting as part of their official duties; on a worldwide, perpetual, irrevocable, royalty-free basis to BMJ Publishing Group Ltd ("BMJ") its licensees and where the relevant Journal is co-owned by BMJ to the co-owners of the Journal, to publish the Work in this journal and any other BMJ products and to exploit all rights, as set out in our [licence](#).

The Submitting Author accepts and understands that any supply made under these terms is made by BMJ to the Submitting Author unless you are acting as an employee on behalf of your employer or a postgraduate student of an affiliated institution which is paying any applicable article publishing charge ("APC") for Open Access articles. Where the Submitting Author wishes to make the Work available on an Open Access basis (and intends to pay the relevant APC), the terms of reuse of such Open Access shall be governed by a Creative Commons licence – details of these licences and which [Creative Commons](#) licence will apply to this Work are set out in our licence referred to above.

Other than as permitted in any relevant BMJ Author's Self Archiving Policies, I confirm this Work has not been accepted for publication elsewhere, is not being considered for publication elsewhere and does not duplicate material already published. I confirm all authors consent to publication of this Work and authorise the granting of this licence.

1  
2  
3  
4 1 Pregnancy among Adolescents Girls in Humanitarian settings: A case in  
5 2 Refugee Camp of Gambella Regional state, Community Based Cross-  
6 3 Sectional Study, Southwest Ethiopia, 2021  
7  
8  
9

10 5 Koang Nyak Bol (koang.nb2013@gmail.com)<sup>1</sup>, Ebissa Negera (ebissanegera@yahoo.com)<sup>2</sup>, Abdi Geda  
11  
12 6 Gedefa (abdi.geda@meu.edu.et)<sup>2</sup>  
13

14 7 1 Regional Health Office, , Gambella, Gambella Regional State, Ethiopia

15  
16 8 2 Public Health Departments, College of Health Science, Mettu University, Mettu, Oromia Region,  
17  
18 9 Ethiopia

20  
21 10 **Correspondence:** Abdi Geda

22  
23 11 Public Health Department, College of Health Science, Mettu University, PO Box: 318, Mettu, Oromia  
24  
25 12 Region, Ethiopia; Email: [abdi.geda@meu.edu.et](mailto:abdi.geda@meu.edu.et)

26  
27 13 ORCID ID: <https://orcid.org/0000-0003-3534-4308>  
28

29 14 **ABSTRACT**

30  
31 15 Objective: The aim of this study was to assess the prevalence of pregnancy and associated factors among  
32  
33 16 adolescent girls in the Nguenyiel refugee camp.

34  
35  
36 17 Methods: A community-based cross-sectional study was done among 414 adolescent girls. The Systematic  
37  
38 18 random sampling technique was used to select respondents. Data were collected using a well-structured and  
39  
40 19 pretested questionnaire. Pregnancy test was done using HCG test. Bivariate and Multivariate logistic regression  
41  
42 20 analysis was run to identify factors associated with adolescent pregnancy.

43  
44  
45 21 Results: The prevalence of pregnancy among adolescent girls in the Nguenyiel refugee camp was 21.7% (95%  
46  
47 22 C.I: 17.6-25.6). Factors associated with adolescent pregnancy were age (17-19 years) (AOR: 2.79; 95% C.I:  
48  
49 23 1.55-5.05); Educational status: Primary education (AOR: 7.69; 95% C.I: 3.55-16.68); No formal education  
50  
51 24 (AOR: 3.42; 95% C.I: 1.59-7.36), and Household living arrangement: Living with none of biological parents  
52  
53 25 (AOR: 2.14; 95% C.I: 1.02-4.49); Living with either of a biological parent (AOR: 3.71; 95% C.I: 1.76-7.81).

54  
55  
56 26 **Conclusions and Recommendations:** This study showed that there is a high prevalence of pregnancy among  
57  
58 27 adolescent girls in the study setting. Age (17-19 years), Educational status, and Household living arrangement  
59  
60

(Live with none of the biological parents; Live with either of biological parents) were among the factors significantly associated with adolescent pregnancy. Hence, health workers and other stakeholders in the camps should focus on strengthening adolescent sexual health education giving especial attention to late adolescents, uneducated and live without biological family.

**Key words:** Adolescents, pregnancy, Gambella, Nguenyiel, Refugee, Ethiopia.

### **Strength and limitation of this study**

- Conducting community-based studies, using primary data including collecting urine samples directly from study participants in humanitarian settings, is strength.
- The HCG test cannot detect a pregnancy that is less than a week old.
- Since adolescent pregnancy is a sensitive issue, respondents may commit social desirability bias.
- Therefore, the prevalence of pregnancy among adolescent girls identified by this study among study participants might be higher than the one reported by this study.

## **INTRODUCTION**

Each year, an estimated 21 million adolescent girls become pregnant every year and approximately 12 million of them give birth worldwide(1). At least 777,000 births occur to adolescent girls younger than 15 years in developing countries(1). Adolescent pregnancy is associated with higher risks of Adverse Birth Outcomes such as preterm birth, Low Birth Weight (LBW), Intra uterine growth retardation (IUGR), stillbirth, unsafe abortion, maternal and neonatal mortality and morbidity compared with women in their twenties (2–10). Complications from pregnancy and childbirth are the leading cause of death among adolescent girls(11,12). Moreover, adolescent pregnancy is associated with social and economic problems like school drop-out, unemployment, and limited future opportunities, risk of remaining poor and, and increased cost for health care (3,13).

Many teenage pregnancies in Ethiopia occur within marriage(14). Similarly, other studies showed that the prevalence of pregnancy among adolescent girls in humanitarian settings (refugee camps or settlements) is 30% higher than among their non-displaced counterparts (13, 14). This is due to the fact that adolescents in humanitarian settings are extremely vulnerable to early sexual practice, violence, and exploitation or abuse compared with their counterparts in general population (15–17). The experience of forced migration impacts

1  
2  
3 54 refugee adolescent girls' decision-making power related to their sexual relationships and reproductive life (10).  
4  
5 55 Hence, adolescents may lack the autonomy to determine over their affairs including their sexual and reproductive  
6  
7 56 health and rights (12,18). Adolescents are also the only age group for whom AIDS deaths are on the rise(11).  
8  
9  
10  
11 57 According to the Ethiopian Demographic and health survey and many other studies, the study area, Gambella  
12  
13 58 Regional State of Ethiopia, has high unmet need for family planning (23%)(14), high polygamy practice  
14  
15 59 (21%)(19) and highest HIV/STIs prevalence in the country due to multiple factors such as, low service coverage,  
16  
17 60 high prevalence of male uncircumcision, early sexual initiation among adolescents related to traditional  
18  
19 61 malpractice like "*Tifo bet*" (20) and environmental factors like presence Gold Mining Workers(21) and others  
20  
21 62 (14,18,20,22–24). Besides, majority of the refugee community including adolescents are those who lost one or  
22  
23 63 both of their parents during the conflict. This leaves adolescent girls helpless and enforce them to be engaged  
24  
25 64 risky sexual behaviours. However, there was no study conducted to determine the prevalence and factors  
26  
27 65 associated with pregnancy among adolescent refugees in humanitarian settings. This study, therefore, aimed at  
28  
29 66 assessing the prevalence of pregnancy among adolescent girls and associated factors in the Nguenyiel refugee  
30  
31 67 camp, Gambella region, Southwest Ethiopia.

## 35 36 68 **METHODS AND MATERIALS**

### 37 38 69 **Study Design and Setting**

39  
40 70 A community-based cross-sectional study was conducted in the Nguenyiel refugee camp, Gambella region,  
41  
42 71 from May 15 to June 15, 2021. The Gambella region hosted a 337,081 refugee population from the bordering  
43  
44 72 country of South Sudan in 7 refugee camps (as of May 2021). The Nguenyiel refugee camp is the newest and  
45  
46 73 largest camp in Ethiopia. It opened to accommodate the new refugee influx from South Sudan following the  
47  
48 74 escalation of conflict in that country in July 2016. It is located in Itang special woreda (district). It is located  
49  
50 75 about 769 km from the capital, Finfinnee/Addis Ababa, and 55 km from the region's capital, Gambella (25) (*See*  
51  
52 76 *figure 1*). It has 10,916 households and total populations of 90,506 with Male (43,757) and Female (46,747).  
53  
54  
55  
56  
57 77 Adolescents constitute majority of the women in the Reproductive age in the camp  
58  
59  
60



## 78 Population

### 79 Source population

80 The source populations were all adolescent girls (10-19 years) in the Nguenyiel refugee camp. The study  
81 populations were adolescent girls in the selected households who participated on this study.

### 82 Eligibility Criteria

#### 83 Inclusion criteria

84 All girls in the adolescence age interval (10-19) who were residents in the Nguenyiel refugee camp at least for  
85 the last six months before the data collection were considered eligible.

#### 86 Sample size determination

87 The sample size was calculated for both objectives. For the first objective, sample size was  
88 calculated using a single population proportion formula with the assumptions of:  $Z = 1.96$  at 95%  
89 confidence interval,  $d =$  Margin of error assumed to be (0.05),  $P =$  prevalence of pregnancy in  
90 adolescent from previous studies (2), and 10% non-response rate;  $n = Z\alpha_2p(1-p)/d^2 = 421$

91 The sample size for the second objective was calculated by using the double population proportion  
92 formula using Epi info version 3.0 statistical software by considering the following assumptions  
93 after reviewing previous literature:  $Z\alpha/2$ : 1.96 at 95% confidence level,  $Z\beta$ : power = statistical  
94 power of 80%,  $P1$ : the probability of outcome in the unexposed,  $P2$ : the probability of outcome in  
95 the exposed and  $r$ : ratio of unexposed to exposed (Table 1).

96 As shown in the above table, since the calculated sample sizes for the second objective are less than  
97 that of the first objective ( $n = 421$ ), finally, the larger sample size ( $n = 421$ ) was taken and used for  
98 this study.

99

100

101

102

103

104

105

106

107

108  
109  
110 Table 1: Sample size calculation based on the significant factors of adolescent pregnancy;  
111 Nguenyiel refugee camp, Gambella region, southwest Ethiopia, 2021.

| S/no. | Significant factors associated with adolescent pregnancy & citations  | Power | 95% C.I | The proportion of pregnancy among non-exposed adolescent girls (P1) | The proportion of pregnancy among exposed (P2) | Risk Ratio (r) | AOR   | n <sub>1</sub> | n <sub>total</sub> |
|-------|-----------------------------------------------------------------------|-------|---------|---------------------------------------------------------------------|------------------------------------------------|----------------|-------|----------------|--------------------|
| 1     | Educational status [No formal education Vs. Secondary and above] (26) | 80%   | 1.96    | 31.0%                                                               | 7.4%                                           | 0.24           | 3.83  | 164            | 181                |
| 2     | Modern contraceptive use [Users Vs. Non-users] (27)                   | 80%   | 1.96    | 64.6%                                                               | 19.2%                                          | 0.29           | 10.62 | 131            | 144                |
| 3     | Marital status [Married Vs. Single (not-married)] (27)                | 80%   | 1.96    | 3.80%                                                               | 54.4%                                          | 14.3           | 2.16  | 33             | 37                 |

112

### 113 Sampling techniques and Procedures

114 A pre-study survey was conducted in the Nguenyiel refugee camp to generate a sampling  
115 frame (i.e., to identify families with adolescent girls), Accordingly, around 4100 households  
116 with adolescent girls were identified and recorded during the pre-study survey. Then, the 421  
117 respondents in the Nguenyiel refugee camp were chosen using a systematic random sampling  
118 technique. The sampling interval was calculated by dividing the number of households with  
119 adolescent girls in the Nguenyiel refugee camp ( $N = 4100$ ) by the sample size ( $n = 421$ ),  
120 resulting in  $K = 4100/421 = 9$ . As a result, every ninth household with an adolescent was  
121 chosen. In cases where a household had two or more adolescents, the lottery technique was  
122 employed to choose one adolescent girl that was interviewed.

## 123 Operational definitions

124 **Adolescent pregnancy:** In this study, adolescent pregnancy is defined as a current  
125 conception (pregnancy) occurring in a girl aged 10 to 19 (i.e., before the age of 20),  
126 regardless of marital status (28)

### 127 **Communication on SRH issues:**

128 An adolescent girl was considered to have parent-adolescent communication on SRH issues if she  
129 discussed with either of her parents at least one of the SRH issues such as menstrual cycle and  
130 fertile period, how one can get pregnant(29).

131 **Knowledge of modern contraceptive methods:** Knowledge of modern contraceptive  
132 methods among adolescent girls was measured based on the score or correctness of  
133 response to the 7 modern contraceptive knowledge-tracing questions.

134 Adolescent girls who responded "Yes" (scored) five or more, 3 to 4, and two or less were  
135 considered to have "**comprehensive knowledge, good knowledge, and poor knowledge**  
136 about contraceptive methods, respectively(29).

## 137 Data collection Tools and Procedures

138 The data was gathered by eight trained diploma nurses and two supervisors with a BSc degree in public health.  
139 A well-structured questionnaire was used in a face-to-face interviewer-administered data collection method. The  
140 questionnaire was adapted from different literature and pretested on sites other than the study area before the  
141 commencement of actual data collection (14,24,30). It contained socio-demographic, family, and individual-  
142 level characteristics, including sexual and reproductive health knowledge, modern contraceptive knowledge, and  
143 other pregnancy-related characteristics. Pregnancy in adolescent girls was determined using urine Human  
144 Chorionic Gonadotropin (HCG) test kits. Each study participant was asked before collecting a urine sample if  
145 she was pregnant or if the pregnancy was visible to the data collectors at the time of data collection (interviews).  
146 Urine samples were then collected from all study participants except those whose pregnancies had been  
147 confirmed.

## 148 Data Quality control and Analysis

149 The questionnaire was first prepared in English and then translated into the local language (Nuer).  
150 Then, it was translated back into English by a different language expert to verify its consistency.  
151 Data collectors and supervisors were provided a two-day training on the importance and objective  
152 of the study.

153 Data collection tools, sampling methods, interviewing techniques, and important precautions and  
154 procedures to be followed while conducting the HCG pregnancy test. The questionnaire was  
155 pretested on 5% of the sample size in places other than the study area. The completeness and  
156 consistency of the data were checked by supervisors on a daily basis. After that, the data was entered  
157 into Epidata software version 3.1 and exported to SPSS version 22. Frequencies and cross-  
158 tabulations were used to check for missed values. Descriptive analysis was done on socio-  
159 demographic, individual-level, and related characteristics and presented using tables and graphs.

160 Bivariate and multivariate logistic regression analysis was done to identify factors  
161 associated with the outcome variable. Accordingly, variables with a p-value  $< 0.25$  on bi-variable  
162 logistic regression were taken as candidates for multivariate analysis. The goodness of fit for the  
163 final regression model was checked by the Hosmer-Lemeshow goodness of fit test at a p-value of  
164  $> 0.05$ . On multivariate logistic regression analysis, variables with a p-value of less than 0.05 at a  
165 95% confidence level were declared significant. The adjusted odds ratio is used to measure the  
166 strength of the association.

## 167 Patient and Public Involvement

168 No Patient and public involvement

## 169 RESULTS

### 170 Socio-Demographic Characteristics of Respondents

171 A total of 414 adolescent girls (10–19 years) participated in this study, making the response rate 98.3%. The  
172 mean age of respondents was 16.8 years with  $\pm 1.52$  SD. The majority of respondents, 241 (58.2%) were late-  
173 stage adolescents (17-19 years), and more than one-third of respondents, 164 (39.6%), were middle adolescent

174 girls (14-16 years), while 9 (2.2%) were in the early adolescence stage (10-13 years). Nearly three-fourths of  
 175 respondents, 309 (74.6%), were protestants, while 57 (13.8%) and 32 (7.7%) were Seventh-Day Adventist and  
 176 Church of God, respectively. More than half, 221 (53.4%) had primary and nearly one-third of respondents, 129  
 177 (31.1%), had no formal education. Three-fourths of adolescent girls, 313 (75.6%) were single (not married) and  
 178 101 (24.4%) were married or ever-married. The majority of married adolescents, 85 (84.2%), get married while  
 179 they are in their middle adolescence age (14-16 years); and one-fifth of marriages, 21 (20.8%), were arranged  
 180 marriages (Table 2).

181 Table 2: Socio-demographic characteristics of respondents (adolescent girls, N=414) in  
 182 Nguenyiel refugee camp, Gambella region, Southwest Ethiopia, September 2021.

| Variable                                  | Category                         | Frequency | Percent |
|-------------------------------------------|----------------------------------|-----------|---------|
| <b>Age category by adolescence stages</b> | Early adolescence (10-13 years)  | 9         | 2.20    |
|                                           | Middle adolescence (14-16 years) | 164       | 39.6    |
|                                           | Late adolescence (17-19 years)   | 241       | 58.2    |
| <b>Religion</b>                           | Protestant                       | 309       | 74.6    |
|                                           | Seventh-Day Adventist            | 57        | 13.8    |
|                                           | Church of God                    | 32        | 7.70    |
|                                           | Catholic                         | 16        | 3.90    |
| <b>Ethnicity</b>                          | Nuer                             | 414       | 100     |
| <b>Educational status</b>                 | Secondary and above              | 64        | 15.5    |
|                                           | Primary education (grade 1-8)    | 221       | 53.4    |
|                                           | No formal education              | 129       | 31.1    |
| <b>Marital status</b>                     | Single (Not married)             | 313       | 75.6    |

|                                             |                                  |    |      |
|---------------------------------------------|----------------------------------|----|------|
|                                             | Married and live together        | 79 | 19.1 |
|                                             | Married and separated            | 14 | 3.40 |
|                                             | Divorced                         | 8  | 1.90 |
| <b>Age at marriage by age groups</b>        | Married before 15 years          | 18 | 17.8 |
|                                             | Married between 15-19 years      | 83 | 82.2 |
| <b>Age at marriage by adolescence stage</b> | Early adolescence (10-13 years)  | 1  | 0.90 |
|                                             | Middle adolescence (14-16 years) | 85 | 84.2 |
|                                             | Late adolescence (17-19 years)   | 15 | 14.9 |
| <b>Marriage arranged by parents</b>         | Yes                              | 21 | 20.8 |
|                                             | No                               | 80 | 79.2 |

183

184 **Family related - characteristics of respondents**

185 Only one hundred twenty-six (30.4%) of the study participants had communication with their parents on sexual  
 186 and reproductive health (SRH) issues, while more than two thirds of adolescent girls (288, 69.6%) had no  
 187 communication with their parents on the issues. Nearly half of adolescents, 194 (46.9%), live with either of their  
 188 biological parents (single parent). One-fourth, 104 (25.4%), live with none of their biological parents, and less  
 189 than one fifth of adolescents, 75 (18.1%), live with both biological parents. The mean family size in households  
 190 of the respondents was 6.32 people, with  $\pm 1.86$  SD and a range of 2–13. The majority of adolescent girls, 351  
 191 (84.8%), live in households with 5 or more people, three-fourths (75%) of whom live in large families of 7 or  
 192 more people (Table 3).

193 Table 3: Familial-level characteristics of respondents in Nguenyiel Refugee Camp Gambella  
 194 region, Southwest Ethiopia, September 2021.

| Variable | Category | Frequency | Percent |
|----------|----------|-----------|---------|
|----------|----------|-----------|---------|

|                                               |                                           |     |      |
|-----------------------------------------------|-------------------------------------------|-----|------|
| <b>Parent-adolescent communication issues</b> | Yes                                       | 126 | 30.4 |
|                                               | No                                        | 288 | 69.6 |
| <b>Household living arrangement</b>           | Live with both biological parents         | 75  | 18.1 |
|                                               | Live with either of the biological parent | 194 | 46.9 |
|                                               | Live with none of biological parent       | 104 | 25.4 |
|                                               | Married (live together with husband)      | 40  | 9.60 |
| <b>Family size</b>                            | Small family (4 persons and below)        | 63  | 15.2 |
|                                               | Large family (5 and more persons)         | 351 | 84.8 |

195

### Respondents Knowledge about contraceptive methods among

196

More than one-third of adolescent girls, 167 (40.3%), had poor knowledge of modern contraceptive methods; 118 (28.5%) and 129 (31.2%), respectively, had good and comprehensive knowledge of modern contraceptives.

198

199

The majority of respondents (326, 78.7%) knew or ever heard of Condom, 305 (73.7%) knew or ever heard of oral contraceptive pills (OCP), more than half (218, 52.7%) knew or heard about injectables (Depo-Provera & NET-EN), and 154 (37.2%) heard about implants (Table 4).

201

202

203

Table 4: Knowledge of modern contraceptive methods among adolescent girls (N=414) in Nguenyiel refugee camp, Gambella region, Southwest Ethiopia, September 2021.

204

| Variable                            | Category                | Frequency (N=414) | Percent |
|-------------------------------------|-------------------------|-------------------|---------|
| Knew or ever heard of OCP           | Yes                     | 305               | 73.7    |
| Knew or ever heard of injectable    | Yes                     | 218               | 52.7    |
| Knew or ever heard of a condom      | Yes                     | 326               | 78.7    |
| Knew or ever heard of implants      | Yes                     | 154               | 37.2    |
| Knew or ever heard of SDM           | Yes                     | 126               | 30.4    |
| Knew or ever heard of IUCD          | Yes                     | 126               | 30.4    |
| Knew or ever heard of sterilization | Yes                     | 51                | 12.3    |
| Over all Knowledge about            | Comprehensive knowledge | 129               | 31.2    |

|                       |                |     |      |
|-----------------------|----------------|-----|------|
| contraceptive methods | Good knowledge | 118 | 28.5 |
|                       | Poor knowledge | 167 | 40.3 |

205

### SRH characteristics (behaviours) of respondents

The mean age at menarche (first menstrual bleeding) was 12.5 years with  $\pm 1.99$  SD. Menarche in almost all respondents, 403 (99.5%), occurred between 10 and 14 years of age. The mean age at first sexual intercourse among respondents was 14.03 years, with  $\pm 3.88$  SD. Almost half of the adolescent girls, 193 (49.6%), were sexually active before 15 years; two-thirds of the respondents, 257 (66.0%), were sexually active in middle adolescence (14–16 years); and 338 (86.9%) of adolescents had sexual intercourse before 18 years. The contraceptive prevalence rate (CPR) among adolescent girls was 27 (6.5%). Out of these, 23 (5.6%) of adolescents had ever used injectables (Depo-Provera and/or NET-EN); 26 (6.3%) used condoms, and 27 (6.5%) of respondents used oral contraceptive pills (OCPs) (Table 5).

Table 5: Sexual behaviour (characteristics) of respondents (adolescent girls), (N = 414) in Nguenyiel refugee camp, Gambella region, Southwest Ethiopia, September 2021.

| Variable                                    | Category                      | Frequency | Percent |
|---------------------------------------------|-------------------------------|-----------|---------|
| <b>Adolescent girl had menarche</b>         | Yes (Menarche occurred)       | 405       | 97.8    |
|                                             | No (Menarche not occurred)    | 9         | 2.20    |
| <b>Sexual practice (N=414)</b>              | Yes (Ever had sexual interco  | 389       | 94.0    |
|                                             | No (Has not ever had sex )    | 25        | 6.00    |
| <b>Age at sexual practice by ag (N=389)</b> | Sexually active before 15 ye: | 193       | 49.6    |
|                                             | Sexually active at 15-19 year | 196       | 50.4    |
| <b>Age at sexual intercourse stages</b>     | Early adolescence (10-13 ye:  | 64        | 16.5    |



|  |                                          |                                |              |
|--|------------------------------------------|--------------------------------|--------------|
|  | Middle adolescence (14-16 y              | 257                            | 66.0         |
|  | Late adolescence (17-19 year)            | 68                             | 17.5         |
|  | <b>Early sexual initiation(debut) (N</b> | <b>Yes</b>                     | <b>338</b>   |
|  |                                          |                                | <b>86.9</b>  |
|  |                                          | <b>No</b>                      | <b>51</b>    |
|  |                                          |                                | <b>13.1</b>  |
|  | <b>Knowledge About</b>                   | <b>Comprehensive knowledge</b> | <b>129</b>   |
|  | <b>contraceptive methods</b>             |                                | <b>31.2</b>  |
|  |                                          | <b>Good knowledge</b>          | <b>118</b>   |
|  |                                          |                                | <b>28.5</b>  |
|  |                                          | <b>Poor knowledge</b>          | <b>167</b>   |
|  |                                          |                                | <b>40.3</b>  |
|  | Total contraceptive use                  | 88                             | 21.26        |
|  | <b>Modern contraceptive use (N=414)</b>  | <b>86</b>                      | <b>20.77</b> |
|  | <b>OCP (N=414)</b>                       | <b>27</b>                      | <b>6.50</b>  |
|  | <b>Injectable (N=414)</b>                | <b>23</b>                      | <b>5.60</b>  |
|  | <b>condom (N=414)</b>                    | <b>26</b>                      | <b>6.30</b>  |
|  | <b>implant (N=414)</b>                   | <b>3</b>                       | <b>0.70</b>  |
|  | <b>SDM (N=414)</b>                       | <b>2</b>                       | <b>0.50</b>  |
|  | <b>IUCD (N=414)</b>                      | <b>5</b>                       | <b>1.20</b>  |

217 N = Sample size (no of response), OCP = Oral Contraceptive Pills, SDM = Standard Day  
 218 Method, IUCD = Intra Uterine Contraceptive Device

219

## 220 Prevalence of adolescent pregnancy in Nguenyiel refugee camp, Gambella region

221 The prevalence of pregnancy among adolescent girls in the Nguenyiel refugee camp was 21.7% (95% C.I: 17.6-  
222 25-6). More than half of pregnant girls (51.1%) were middle adolescents (14–16 years) and 48.9% were late  
223 adolescents (17–19 years old).

## 224 Factors associated with pregnancy among Adolescent

225 Age (17–19 years), educational status (no formal education, primary education), and family structure (living  
226 with either biological parent; living with neither biological parent) were statistically significantly associated with  
227 pregnancy among adolescent girls (10–19 years) in Nguenyiel refugee camp.

228 The odds of pregnancy among late adolescent girls (17-19 years) was 2.8 times higher compared with adolescents  
229 10-16 years of age (AOR: 2.8; 95% C.I: 1.6-5.1). Adolescent girls with primary education (grade 1–8) were 7.7  
230 times more likely to become pregnant compared with those with secondary and above (AOR: 7.7; 95% C.I: 3.55–  
231 16.7). Similarly, the odds of pregnancy among adolescent girls with no formal education were 3.4 times higher  
232 compared with girls who attended secondary school and above (AOR: 3.4; 95% C.I: 1.6-7.4).

233 Odds of pregnancy among adolescent girls living with none of their biological parents were two times  
234 more likely to be pregnant compared with adolescents living with both biological parents (AOR: 2.1;  
235 95% C.I: 1.02-4.5). Likewise, the odds of pregnancy among adolescent girls living with either of their biological  
236 parents was 3.7 times higher compared with girls living with both of their biological parents (AOR: 3.7; 95%  
237 C.I: 1.8–7.8) (Table 6).

238 Table 6: Factors associated with pregnancy among adolescent girls (10-19 years) in Nguenyiel refugee camp,  
239 Gambella region, Southwest Ethiopia, September 2021.

| Variable                    | Pregnancy (status)            | AOR (95% C.I) | P-value    |                  |                 |
|-----------------------------|-------------------------------|---------------|------------|------------------|-----------------|
|                             |                               |               |            | Yes (HCC)        | No(HCGnegative) |
| Categories                  | N (%)                         | N (%)         |            |                  |                 |
| Age (stages of adolescence) | 10-16 years                   | 46 (51.1)     | 127 (39.2) | 1                |                 |
|                             | 17-19 years                   | 44 (48.9)     | 197 (60.8) | 2.79 (1.55-4.9)  | 0.001           |
|                             | Secondary and above           | 26 (28.9)     | 38 (11.7)  | 1                |                 |
| Educational status          | Primary education (grade 1-8) | 26 (28.9)     | 195 (60.2) | 7.69 (3.55-16.7) | 0.001           |
|                             | No formal education           | 38 (42.2)     | 91 (28.1)  | 3.42 (1.59-7.4)  | 0.002           |

|                                       |                                        |           |            |                  |       |
|---------------------------------------|----------------------------------------|-----------|------------|------------------|-------|
| Sexual experience                     | Sexually active at 15-19 year-old      | 54 (60.0) | 142 (47.5) | 1                |       |
|                                       | Sexually active before 15 years of age | 36 (40.0) | 157 (52.5) | 1.39 (0.76-2.54) | 0.282 |
| Knowledge about contraceptive         | Comprehensive knowledge                | 37 (41.1) | 92 (28.4)  | 1                |       |
|                                       | Good knowledge                         | 20 (22.2) | 98 (30.2)  | 1.29 (0.62-2.69) | 0.496 |
|                                       | Poor knowledge                         | 33 (36.7) | 134 (41.4) | 1.73 (0.90-3.32) | 0.100 |
| Early sexual debut (before 18 years)  | No                                     | 6 (11.8)  | 84 (24.9)  | 1                |       |
|                                       | Yes                                    | 45 (88.2) | 254 (75.1) | 0.41 (0.14-1.17) | 0.096 |
| Parent-adolescent Communication (SRH) | Yes                                    | 40 (44.4) | 86 (26.5)  | 1                |       |
| Household living arrangement          | No                                     | 50 (55.6) | 238 (73.5) | 1.37 (0.73-2.54) | 0.326 |
|                                       | Live with both biological parents      | 29 (32.2) | 46 (14.2)  | 1                |       |
|                                       | Live with either of biological parent  | 23 (25.6) | 171 (52.8) | 3.71 (1.76-7.81) | 0.001 |
|                                       | Live with none of biological parents   | 25 (27.8) | 80 (24.7)  | 2.14 (1.02-4.49) | 0.043 |
|                                       | Married and live together with husband | 13 (14.4) | 27 (8.30)  | 2.04 (0.81-5.14) | 0.132 |

241

## 242 DISCUSSIONS

242

243 This study showed that the prevalence of pregnancy among adolescent girls (10–19 years) in the Nguenyiil  
 244 refugee camp was high. This finding is consistent with findings of similar studies conducted among South  
 245 Sudanese refugees (10–19 years) in the Bidibidi refugee settlement, northern Uganda (25%)(4), Eritrean  
 246 refugees in the northern Tigray region, Ethiopia (28.4%) (31), Somalian refugees in Kobe refugee camp of  
 247 Somali region, Ethiopia (26.3%) (32), and among refugees in Thailand-Myanmar border settlement, South-east  
 248 Asia (33).

249 The observed similarity could be due to similar socio-demographic and socioeconomic characteristics in  
 250 humanitarian settings as well as similarity in the vulnerability of adolescent girls to SRH problems in  
 251 humanitarian settings.

1  
2  
3 252 The findings of this study are higher than the findings of similar studies among adolescent girls in non-emergency  
4  
5 253 (non-humanitarian) settings: in Africa (a pooled prevalence of 18.8%)(34). Arba Minch town, Southern Ethiopia  
6  
7 254 (7.7%),(35), Gambella region of Ethiopia (16.2%) and India (10%) (36).

9 255 The possible reasons for the difference in the prevalence of adolescent pregnancy in humanitarian settings  
10  
11 256 compared with non-emergency contexts could be due to differences in settings. That is, adolescents in  
12  
13 257 humanitarian settings are more vulnerable to poor socio-economic status following the disruption of family  
14  
15 258 structure, loss of father or mother, or both, during conflict or disaster.

17 259 This in turn leads adolescents to hopelessness, being prone to gender-based violence and early marriage. In  
18  
19 260 addition to that, basic reproductive health care services like family planning, including health information  
20  
21 261 communication on reproductive issues, are less available in humanitarian settings than in non-humanitarian  
22  
23 262 settings.

26 263 On the other hand, the finding of this study is lower than that of studies conducted in: Nigeria (45.4%)(37),  
27  
28 264 Eastern Ethiopia, (30.2%)(34), East Africa (pooled prevalence of 54.6%)(38), Uganda (35.8%)(39) and north  
29  
30 265 east Ethiopia (28.6%)(27). The possible explanation for this discrepancy could be difference in socio-  
31  
32 266 demographic, socio-economic, larger sample size and inclusion terminated pregnancy in the case of East Africa  
33  
34 267 pooled prevalence.

36 268 This study showed that pregnancy among refugee adolescents was associated with increasing age; the odds of  
37  
38 269 pregnancy among late adolescent girls (17–19 years) was higher than girls in the early and middle stages of  
39  
40 270 adolescence (10–16 years). This is in line with studies conducted in Eastern Ethiopia, East Africa, Northeast  
41  
42 271 Ethiopia, and Kenya. (27,34,38,40). This could be due to the fact that as age increases, teenagers will have more  
43  
44 272 exposure to sex and their chance of getting married also increase.

46 273 Adolescent girls with primary education (grade 1-8) were more likely to become pregnant compared with their  
47  
48 274 counterparts who attended secondary and above. Likewise, the odds of pregnancy among adolescents with no  
49  
50 275 formal education was high compared with girls who attained secondary and above.

51 276 This is similar with finding of studies conducted in Eastern Ethiopia (41), South East Nigeria(37), a systematic  
52  
53 277 review and Meta-analysis in Africa(42) (42), a multi-level analysis in five East African countries(43).The

278 possible justification could be adolescent girls with lower educational attainment lack appropriate information  
279 regarding the consequence of unsafe sexual practice as well as the means to avoid unwanted pregnancy.

280 This study showed that household living arrangements (family structure) were associated with adolescent  
281 pregnancy: Adolescent girls living with none of their biological parents were more likely to be pregnant  
282 compared with adolescents living with both biological parents (i.e., living in nuclear families). The odds of  
283 pregnancy among adolescent girls living with either of their biological parents (single parent families) higher  
284 compared with girls living with both of their biological parents. This is similar to the findings of studies  
285 conducted in Southern Ethiopia (35), eastern Ethiopia(34) and north east Ethiopia (27). This could be because  
286 adolescent girls who did not live with one or both of their biological parents lack parental support and guidance.  
287 Adolescent girls might have lost one or both of their biological parents during the conflict. Adolescents in this  
288 situation may feel helpless and hopeless and choose to get married or engage in unsafe sex to secure their  
289 survival.

## 290 CONCLUSIONS

291 This study showed a high prevalence of pregnancy among refugee adolescent girls (10–19 years) in the  
292 Nguenyiel refugee camp, Gambella region, Ethiopia. The significant factors associated with adolescent  
293 pregnancy were: Age (17–19 years), educational status (no formal education; primary education), and household  
294 living arrangement or family structure: Live with none of the biological parents; live with either of the biological  
295 parents.

## 296 Recommendation

### 297 *Health Care Provider*

298 Health workers in the camps should work to strengthen targeted adolescent sexual health education  
299 and information, giving special attention to the uneducated, those living without biological family,  
300 and late adolescents.

1  
2  
3 301 **Humanitarian organizations (MS, ARRA, UNHCR, etc.)**

4 302 Strengthen adolescent-youth-friendly services and adolescent girls' empowerment in refugee camps.

6  
7 303 Strengthen health education and schooling for refugee adolescent girls.

8  
9 304 strengthen comprehensive sexuality education (CSE) programs at schools in refugee camps.

10  
11 305 Adolescent girls who have lost their parents should be given special attention.

12  
13 306 **Regional Health Bureaus, Zonal and other Health Offices**

14  
15 307 Strengthening intervention programs aimed at preventing pregnancy among refugee adolescents.

16  
17 308 Prepare programs and strategies (approaches) to support refugee adolescent girls living with none or either of  
18  
19 309 their biological parents

20  
21  
22  
23 310 **Researchers**

24 311 Future researchers should focus on exploring the underlying socio-cultural conditions through a mixed approach  
25  
26 312 (qualitative and quantitative study).

27  
28 313 Important points that are not addressed in this study, like the level of unmet need for family planning and the  
29  
30 314 prevalence of unwanted pregnancy, are among the issues that seek the attention of future researchers.

31  
32 315 *Consent to publish*

33 316 Not applicable.

34 317 *Availability of data and materials*

35 318 All the data used or mentioned in this research are available

36 319 *Competing interests*

37 320 The authors declare that they have no competing interests.

38 321 *Funding*

39 322 The authors declare that no financial support in the research, authorship, and publication of this article was  
40  
41 323 received

42 324 *Author's contribution*

43 325 **Koang Nyak Bol:** made a significant contribution to the conception, study design, execution,  
44  
45 326 acquisition of data, analysis, and interpretation and has agreed on the journal to which the article  
46  
47 327 has been submitted.

48 328 **Ebissa Negera:** took part in study design, execution, drafting, revising and critically reviewing

49 329 the article; gave final approval of the version to be published; agreed on the journal to which the

50  
51 330 article has been submitted.  
52  
53  
54  
55  
56  
57  
58  
59  
60

1  
2  
3 331 **Abdi Geda Gedefa:** contributed to planning, acquisition of data, analysis and interpretation,  
4  
5 332 revising and critically reviewing the article, writing the report, and agreed on the journal to which  
6  
7 333 the article has been submitted.  
8  
9

10 334 *Acknowledgement*

11 335 We would like to acknowledge Mettu University for financial support. We are also grateful to the data collectors  
12  
13 336 and respondents who took part in this study.  
14

15 337 *Abbreviations and Acronyms*

|        |       |                                                  |
|--------|-------|--------------------------------------------------|
| 16 338 | ASRH  | Adolescent Sexual And Reproductive Health        |
| 17     |       |                                                  |
| 18 339 | ARRA  | Administration For Refugees And Returnees Affair |
| 19     |       |                                                  |
| 20 340 | HCG   | Human Chorionic Gonadotropins                    |
| 21     |       |                                                  |
| 22 341 | IUGR  | Intra-Uterine Growth Restriction                 |
| 23     |       |                                                  |
| 24 342 | LBW   | Low-Birth Weight                                 |
| 25     |       |                                                  |
| 26 343 | OCP   | Oral Contraceptive Pills                         |
| 27     |       |                                                  |
| 28 344 | LMICs | Low And Middle-Income Countries                  |
| 29     |       |                                                  |
| 30 345 | SSA   | Sub-Sahara Africa                                |
| 31     |       |                                                  |
| 32 346 | SDM   | Standard Day Method                              |
| 33     |       |                                                  |
| 34 347 | SRH   | Sexual And Reproductive Health;                  |
| 35     |       |                                                  |
| 36 348 | RC    | Refugee Camp                                     |
| 37     |       |                                                  |
| 38     |       |                                                  |
| 39     |       |                                                  |
| 40     |       |                                                  |
| 41     |       |                                                  |
| 42     |       |                                                  |
| 43     |       |                                                  |
| 44     |       |                                                  |
| 45     |       |                                                  |
| 46     |       |                                                  |
| 47     |       |                                                  |
| 48     |       |                                                  |
| 49     |       |                                                  |
| 50     |       |                                                  |
| 51     |       |                                                  |
| 52     |       |                                                  |
| 53     |       |                                                  |
| 54     |       |                                                  |
| 55     |       |                                                  |
| 56     |       |                                                  |
| 57     |       |                                                  |
| 58     |       |                                                  |
| 59     |       |                                                  |
| 60     |       |                                                  |

349

## Declarations

### Ethics approval and consent to participate

This study was done according to the Declaration of Helsinki.

Research Ethical Committee of Mettu University provided Ethical approval for this study with reference number: RPG/03/2013. The Gambella Regional Health Bureau and ARRA, Gambella Zonal office provided a formal letter of permission. Data collectors were trained on how to handle confidential and private participant information.

Confidentiality was assured by excluding participants' names from the data collection tools. The study purpose, procedure, and duration were clearly explained to study participants. Study participants engaged in the study were informed that they could skip any question they didn't want to respond to and could quit the interview if they felt discomfort. Then consent was obtained from the study participants who were 18 years of age or older. For those who were less than 18 years, assent was taken from the participants but consent was taken from their representatives based on article 25 of the Declaration of Helsinki.

## References

1. Adolescent pregnancy [Internet]. [cited 2022 May 5]. Available from: <https://www.who.int/news-room/fact-sheets/detail/adolescent-pregnancy>
2. Kawakita T, Wilson K, Grantz KL, Landy HJ, Huang CC, Gomez-Lobo V. Adverse Maternal and Neonatal Outcomes in Adolescent Pregnancy. *J Pediatr Adolesc Gynecol*. 2016;29(2):130–6.
3. Nguyen PH, Sanghvi T, Tran LM, Afsana K, Mahmud Z, Aktar B, et al. The nutrition and health risks faced by pregnant adolescents: Insights from a cross-sectional study in Bangladesh. *PLoS One*. 2017;12(6):1–13.
4. Bakesiima R, Cleeve A, Larsson E, Tumwine JK, Ndeezi G, Danielsson KG, et al. Modern contraceptive use among female refugee adolescents in northern Uganda: Prevalence and associated factors. *Reprod Health*. 2020;17(1):1–9.
5. Nove A, Matthews Z, Neal S, Camacho AV. Maternal mortality in adolescents compared with women of other ages: Evidence from 144 countries. *Lancet Glob Heal*. 2014;2(3):e155–64.
6. Parker AL, Parker DM, Zan BN, Min AM, Gilder ME, Ringringulu M, et al. e. 2018;(May).
7. Zhang T, Wang H, Wang X, Yang Y, Zhang Y, Tang Z, et al. The adverse maternal and perinatal outcomes of adolescent pregnancy: A cross sectional study in Hebei, China. *BMC Pregnancy Childbirth*. 2020;20(1):1–10.
8. World Health Organization Regional Office for South-East Asia. Adolescent Pregnancy Situation in South-East Asia Region. *Media Cent*. 2015;1–194.



- 1  
2  
3 383 9. Johnson W, Moore SE. Adolescent pregnancy, nutrition, and health outcomes in low- and  
4 384 middle-income countries: what we know and what we don't know. Vol. 123, BJOG: An  
5 385 International Journal of Obstetrics and Gynaecology. 2016. p. 1589–92.
- 7 386 10. Indarti J, Al Fattah AN, Dewi Z, Hasani RDK, Mahdi FAN, Surya R. Teenage Pregnancy:  
8 387 Obstetric and Perinatal Outcome in a Tertiary Centre in Indonesia. *Obstet Gynecol Int.*  
9 388 2020;2020.
- 11 389 11. Adolescent health and well-being | UNICEF [Internet]. [cited 2022 Jan 3]. Available from:  
12 390 <https://www.unicef.org/health/adolescent-health-and-well-being>
- 14 391 12. Adolescent pregnancy [Internet]. [cited 2022 Jan 3]. Available from:  
15 392 <https://www.who.int/news-room/fact-sheets/detail/adolescent-pregnancy>
- 17 393 13. Mekonnen T, Dune T, Perz J. Maternal health service utilisation of adolescent women in sub-  
18 394 Saharan Africa: A systematic scoping review. *BMC Pregnancy Childbirth.* 2019;19(1).
- 20 395 14. EDHS 2016 Team. Ethiopian Demographic and Health Survey. Report. 2016;
- 22 396 15. Morris JL, Rushwan H. Adolescent sexual and reproductive health: The global challenges.  
23 397 2015; Available from: <http://dx.doi.org/10.1016/j.ijgo.2015.02.006>
- 25 398 16. Kerner B, Manohar S, Mazzacurati C, Tanabe M. Adolescent Sexual and Reproductive Health  
26 399 in Humanitarian Settings [Internet]. Vol. 40, *Forced Migration Review.* 2012. 21–22 p.  
27 400 Available from: <http://www.fmreview.org/young-and-out-of-place>
- 29 401 17. Neal S, Mahendra S, Bose K, Camacho AV, Mathai M, Nove A, et al. The causes of maternal  
30 402 mortality in adolescents in low and middle income countries: Systematic review of the  
31 403 literature. *BMC Pregnancy Childbirth.* 2016;16(1):1–18.
- 33 404 18. Adolescent pregnancy | United Nations Population Fund [Internet]. [cited 2022 Jan 3].  
34 405 Available from: <https://www.unfpa.org/adolescent-pregnancy>
- 36 406 19. Tadesse A, Geda A. Why Syphilis Infection is High Among Pregnant Women in Refugee  
37 407 Camps ? A Case in Ethiopia. 2022;(March):481–9.
- 39 408 20. Qanche Q, Wondimu W, Asefa A, Yosef T, Midaksa G, Nigussie T. Factors Contributing to  
40 409 High HIV Prevalence in Majang Zone, Southwest Ethiopia: What Lies Beneath the Tip of the  
41 410 Iceberg? *J Multidiscip Healthc* [Internet]. 2021 [cited 2022 Sep 1];14:3273. Available from:  
42 411 </pmc/articles/PMC8630364/>
- 44 412 21. Nigussie T, Mamo Y, Qanche Q, Yosef T, Wondimu W, Asefa A. HIV Preventive Behaviors  
45 413 and Associated Factors among Gold Mining Workers in Dima District, Southwest Ethiopia,  
46 414 2019: Community-Based Cross-Sectional Study. *Biomed Res Int.* 2021;2021.
- 48 415 22. Kibret GD, Ferede A, Leshargie CT, Wagnaw F, Ketema DB, Alebel A. Trends and spatial  
49 416 distributions of HIV prevalence in Ethiopia. *Infect Dis Poverty* [Internet]. 2019 Oct 17 [cited  
50 417 2022 Jan 4];8(1):1–9. Available from:  
51 418 <https://idpjournal.biomedcentral.com/articles/10.1186/s40249-019-0594-9>
- 53 419 23. Central Statistical Agency Addis Ababa E. UNICEF Ethiopia. Ethiopia Demographic and  
54 420 Health Survey. Addis Ababa, Ethiopia, and Rockville, Maryland, USA: CSA and ICF.. Addis  
55 421 Ababa, Ethiopia, and Rockville, Maryland, USA: CSA and ICF. 2016. 249 p.
- 57 422 24. Ethiopian Public Health Institute (EPHI), ICF. Ethiopia Mini Demographic and Health Survey  
58 423 2019: Final Report [Internet]. 2021. 1–207 p. Available from:  
59 424 <https://dhsprogram.com/pubs/pdf/FR363/FR363.pdf>
- 60

- 1  
2  
3 425 25. UNHCR. Nguenyiel refugee camp. 2020;(March). Available from:  
4 426 <https://reliefweb.int/sites/reliefweb.int/files/resources/77009.pdf>  
5
- 6 427 26. Kefale B, Yalew M, Damtie Y, Adane B. A multilevel analysis of factors associated with  
7 428 teenage pregnancy in ethiopia. *Int J Womens Health*. 2020;12:785–93.  
8
- 9 429 27. Habitu YA, Yalew A, Bisetegn TA. Prevalence and Factors Associated with Teenage  
10 430 Pregnancy, Northeast Ethiopia, 2017: A Cross-Sectional Study. *J Pregnancy [Internet]*. 2018  
11 431 [cited 2022 Mar 10];2018. Available from: [/pmc/articles/PMC6236922/](https://pubmed.ncbi.nlm.nih.gov/36236922/)  
12
- 13 432 28. Birhanu BE, Kebede DL, Kahsay AB, Belachew AB. Predictors of teenage pregnancy in  
14 433 Ethiopia: A multilevel analysis. *BMC Public Health [Internet]*. 2019 May 17 [cited 2022 May  
15 434 6];19(1):1–10. Available from: <https://link.springer.com/articles/10.1186/s12889-019-6845-7>  
16
- 17 435 29. Yimer AS, Modiba LM. Modern contraceptive methods knowledge and practice among blind  
18 436 and deaf women in Ethiopia. A cross-sectional survey. *BMC Womens Health*. 2019;19(1):1–  
19 437 13.  
20
- 21 438 30. Nguyen PH, Sanghvi T, Tran LM, Afsana K, Mahmud Z, Aktar B, et al. The nutrition and  
22 439 health risks faced by pregnant adolescents: Insights from a cross-sectional study in  
23 440 Bangladesh. *PLoS One [Internet]*. 2017 Jun 1 [cited 2022 May 6];12(6):e0178878. Available  
24 441 from: <https://journals.plos.org/plosone/article?id=10.1371/journal.pone.0178878>  
25
- 26 442 31. Gebrecherkos K, Gebremariam B, Gebeyehu A, Siyum H, Kahsay G, Abay M. Unmet need for  
27 443 modern contraception and associated factors among reproductive age group women in Eritrean  
28 444 refugee camps, Tigray, north Ethiopia: A cross-sectional study 11 *Medical and Health  
29 445 Sciences 1117 Public Health and Health Services 11 Medical and H. BMC Res Notes  
30 446 [Internet]*. 2018;11(1):1–6. Available from: <https://doi.org/10.1186/s13104-018-3956-7>  
31
- 32 447 32. Elnakib S, Hunersen K, Metzler J, Bekele H, Robinson WC. Child marriage among Somali  
33 448 refugees in Ethiopia: a cross sectional survey of adolescent girls and adult women. *BMC  
34 449 Public Health*. 2021;21(1):1–12.  
35
- 36 450 33. Parker AL, Parker DM, Zan BN, Min AM, Gilder ME, Ringringulu M, et al. Trends and birth  
37 451 outcomes in adolescent refugees and migrants on the Thailand-Myanmar border, 1986-2016:  
38 452 An observational study [version 1; referees: 2 approved]. *Wellcome Open Res*. 2018;3(0).  
39
- 40 453 34. Mezmur H, Assefa N, Alemayehu T. Teenage pregnancy and its associated factors in eastern  
41 454 ethiopia: A community-based study. *Int J Womens Health*. 2021;13:267–78.  
42
- 43 455 35. Mathewos S, Mekuria A. Teenage Pregnancy and Its Associated Factors among School  
44 456 Adolescents of Arba Minch Town, Southern Ethiopia. *Ethiop J Health Sci [Internet]*. 2018  
45 457 May 18 [cited 2022 Mar 9];28(3):287–98. Available from:  
46 458 <https://www.ajol.info/index.php/ejhs/article/view/171332>  
47
- 48 459 36. Mahavarkar SH, Madhu CK, Mule VD. A comparative study of teenage pregnancy.  
49 460 <http://dx.doi.org/10.1080/01443610802281831> [Internet]. 2009 Aug [cited 2022 Mar  
50 461 9];28(6):604–7. Available from:  
51 462 <https://www.tandfonline.com/doi/abs/10.1080/01443610802281831>  
52
- 53 463 37. Uwaezuoke AI, Uzochukwu BS, Nwagbo DF, Onwujekwe OE. Determinants of Teenage  
54 464 Pregnancy in Rural Communities of Abia State, South East Nigeria. *Int J Med Heal Dev  
55 465 [Internet]*. 2004 Jun 18 [cited 2022 Mar 9];9(1):28–33. Available from:  
56 466 <https://www.ajol.info/index.php/jcm/article/view/10471>  
57
- 58 467 38. Worku MG, Tessema ZT, Teshale AB, Tesema GA, Yeshaw Y. Prevalence and associated  
59 468 factors of adolescent pregnancy (15–19 years) in East Africa: a multilevel analysis. *BMC*  
60

- 1  
2  
3 469 Pregnancy Childbirth. 2021;21(1):1–8.  
4  
5 470 39. Council T, District K, Sectional AC. Primary Health Care : Open Access Factors Associated  
6 471 with Teenage Pregnancy and its Effects in Kibuku. 2018;8(2).  
7  
8 472 40. Omoro T, Gray SC, Otieno G, Mbede C, Phillips-Howard PA, Hayes T, et al. Teen pregnancy  
9 473 in rural western Kenya: a public health issue. <http://mc.manuscriptcentral.com/rady> [Internet].  
10 474 2017 Oct 2 [cited 2022 Mar 9];23(4):399–408. Available from:  
11 475 <https://www.tandfonline.com/doi/abs/10.1080/02673843.2017.1402794>  
12  
13 476 41. Mezmur H, Assefa N, Alemayehu T. Teenage Pregnancy and Its Associated Factors in Eastern  
14 477 Ethiopia: A Community-Based Study. 2021 [cited 2022 Mar 9]; Available from:  
15 478 <http://doi.org/10.2147/IJWH.S287715>  
16  
17 479 42. Kassa GM, Arowojolu AO, Odukogbe AA, Yalew AW. Prevalence and determinants of  
18 480 adolescent pregnancy in Africa: a systematic review and Meta-analysis. *Reprod Health*  
19 481 [Internet]. 2018 Nov 29 [cited 2022 Mar 9];15(1). Available from:  
20 482 </pmc/articles/PMC6267053/>  
21  
22 483 43. Wado YD, Sully EA, Mumah JN. Pregnancy and early motherhood among adolescents in five  
23 484 East African countries: A multi-level analysis of risk and protective factors. *BMC Pregnancy*  
24 485 *Childbirth*. 2019;19(1):1–11.  
25  
26 486  
27  
28 487 **Figure 1:** Map of Nguenyiel refugee camp, Gambella, Ethiopia.  
29  
30 488 Source: [nguenyiel refugee camp map - Bing](#))  
31  
32 489  
33  
34 490  
35  
36  
37  
38  
39  
40  
41  
42  
43  
44  
45  
46  
47  
48  
49  
50  
51  
52  
53  
54  
55  
56  
57  
58  
59  
60

1  
2  
3 Map of Nguenyyiel refugee Camp  
4  
5



28 Figure 1. Map of Nguenyyiel refugee Camp, Gambella, Ethiopia.

29  
30 Source: [nguennyiel refugee camp map - Bing](#)  
31  
32  
33  
34  
35  
36  
37  
38  
39  
40  
41  
42  
43  
44  
45  
46  
47  
48  
49  
50  
51  
52  
53  
54  
55  
56  
57  
58  
59  
60

STROBE Statement—Checklist of items that should be included in reports of *cross-sectional studies*

|                              | Item No | Recommendation                                                                                                                                                                                               | Page No |
|------------------------------|---------|--------------------------------------------------------------------------------------------------------------------------------------------------------------------------------------------------------------|---------|
| <b>Title and abstract</b>    | 1       | (a) Indicate the study's design with a commonly used term in the title or the abstract                                                                                                                       | 1       |
|                              |         | (b) Provide in the abstract an informative and balanced summary of what was done and what was found                                                                                                          | 1-2     |
| <b>Introduction</b>          |         |                                                                                                                                                                                                              |         |
| Background/rationale         | 2       | Explain the scientific background and rationale for the investigation being reported                                                                                                                         | 2-3     |
| Objectives                   | 3       | State specific objectives, including any prespecified hypotheses                                                                                                                                             | 1       |
| <b>Methods</b>               |         |                                                                                                                                                                                                              |         |
| Study design                 | 4       | Present key elements of study design early in the paper                                                                                                                                                      | 3       |
| Setting                      | 5       | Describe the setting, locations, and relevant dates, including periods of recruitment, exposure, follow-up, and data collection                                                                              | 3-5     |
| Participants                 | 6       | (a) Give the eligibility criteria, and the sources and methods of selection of participants                                                                                                                  | 4,6     |
| Variables                    | 7       | Clearly define all outcomes, exposures, predictors, potential confounders, and effect modifiers. Give diagnostic criteria, if applicable                                                                     | 6       |
| Data sources/<br>measurement | 8*      | For each variable of interest, give sources of data and details of methods of assessment (measurement). Describe comparability of assessment methods if there is more than one group                         | 6       |
| Bias                         | 9       | Describe any efforts to address potential sources of bias                                                                                                                                                    | 6       |
| Study size                   | 10      | Explain how the study size was arrived at                                                                                                                                                                    | 4-5     |
| Quantitative variables       | 11      | Explain how quantitative variables were handled in the analyses. If applicable, describe which groupings were chosen and why                                                                                 | 6       |
| Statistical methods          | 12      | (a) Describe all statistical methods, including those used to control for confounding                                                                                                                        | 6       |
|                              |         | (b) Describe any methods used to examine subgroups and interactions                                                                                                                                          | 6       |
|                              |         | (c) Explain how missing data were addressed                                                                                                                                                                  | 6       |
|                              |         | (d) If applicable, describe analytical methods taking account of sampling strategy                                                                                                                           | 6       |
|                              |         | (e) Describe any sensitivity analyses                                                                                                                                                                        |         |
| <b>Results</b>               |         |                                                                                                                                                                                                              |         |
| Participants                 | 13*     | (a) Report numbers of individuals at each stage of study—eg numbers potentially eligible, examined for eligibility, confirmed eligible, included in the study, completing follow-up, and analysed            | 4,6     |
|                              |         | (b) Give reasons for non-participation at each stage                                                                                                                                                         | NA      |
|                              |         | (c) Consider use of a flow diagram                                                                                                                                                                           |         |
| Descriptive data             | 14*     | (a) Give characteristics of study participants (eg demographic, clinical, social) and information on exposures and potential confounders                                                                     | 6       |
|                              |         | (b) Indicate number of participants with missing data for each variable of interest                                                                                                                          | 4,5,7   |
| Outcome data                 | 15*     | Report numbers of outcome events or summary measures                                                                                                                                                         | 7       |
| Main results                 | 16      | (a) Give unadjusted estimates and, if applicable, confounder-adjusted estimates and their precision (eg, 95% confidence interval). Make clear which confounders were adjusted for and why they were included |         |

|                          |    |                                                                                                                                                                            |           |
|--------------------------|----|----------------------------------------------------------------------------------------------------------------------------------------------------------------------------|-----------|
|                          |    | (b) Report category boundaries when continuous variables were categorized                                                                                                  | NA        |
|                          |    | (c) If relevant, consider translating estimates of relative risk into absolute risk for a meaningful time period                                                           | NA        |
| Other analyses           | 17 | Report other analyses done—eg analyses of subgroups and interactions, and sensitivity analyses                                                                             | 7         |
| <b>Discussion</b>        |    |                                                                                                                                                                            |           |
| Key results              | 18 | Summarise key results with reference to study objectives                                                                                                                   | 12, 13,17 |
| Limitations              | 19 | Discuss limitations of the study, taking into account sources of potential bias or imprecision. Discuss both direction and magnitude of any potential bias                 | 16        |
| Interpretation           | 20 | Give a cautious overall interpretation of results considering objectives, limitations, multiplicity of analyses, results from similar studies, and other relevant evidence | 16        |
| Generalisability         | 21 | Discuss the generalisability (external validity) of the study results                                                                                                      | 16        |
| <b>Other information</b> |    |                                                                                                                                                                            |           |
| Funding                  | 22 | Give the source of funding and the role of the funders for the present study and, if applicable, for the original study on which the present article is based              | 18        |

\*Give information separately for exposed and unexposed groups.

**Note:** An Explanation and Elaboration article discusses each checklist item and gives methodological background and published examples of transparent reporting. The STROBE checklist is best used in conjunction with this article (freely available on the Web sites of PLoS Medicine at <http://www.plosmedicine.org/>, Annals of Internal Medicine at <http://www.annals.org/>, and Epidemiology at <http://www.epidem.com/>). Information on the STROBE Initiative is available at [www.strobe-statement.org](http://www.strobe-statement.org).

# BMJ Open

## Pregnancy among Adolescents Girls in Humanitarian settings: A case in Refugee Camp of Gambella Regional state, Community Based Cross-Sectional Study, Southwest Ethiopia, 2021

|                                 |                                                                                                                                                                                                                                                                                  |
|---------------------------------|----------------------------------------------------------------------------------------------------------------------------------------------------------------------------------------------------------------------------------------------------------------------------------|
| Journal:                        | <i>BMJ Open</i>                                                                                                                                                                                                                                                                  |
| Manuscript ID                   | bmjopen-2022-064732.R2                                                                                                                                                                                                                                                           |
| Article Type:                   | Original research                                                                                                                                                                                                                                                                |
| Date Submitted by the Author:   | 23-Oct-2022                                                                                                                                                                                                                                                                      |
| Complete List of Authors:       | Bol, Koang Nyak; World Health Organization, Universal Health Coverage, Communicable, and Non-communicable Diseases (UCN) Cluster, Neglected Tropical Diseases (NTDs) Program<br>Negera, Ebissa; Mettu University, Public Health<br>Gedefa, Abdi; Mettu University, Public Health |
| <b>Primary Subject Heading</b>: | Reproductive medicine                                                                                                                                                                                                                                                            |
| Secondary Subject Heading:      | Public health, Sexual health                                                                                                                                                                                                                                                     |
| Keywords:                       | Reproductive medicine < GYNAECOLOGY, Public health < INFECTIOUS DISEASES, Maternal medicine < OBSTETRICS                                                                                                                                                                         |
|                                 |                                                                                                                                                                                                                                                                                  |

SCHOLARONE™  
Manuscripts



I, the Submitting Author has the right to grant and does grant on behalf of all authors of the Work (as defined in the below author licence), an exclusive licence and/or a non-exclusive licence for contributions from authors who are: i) UK Crown employees; ii) where BMJ has agreed a CC-BY licence shall apply, and/or iii) in accordance with the terms applicable for US Federal Government officers or employees acting as part of their official duties; on a worldwide, perpetual, irrevocable, royalty-free basis to BMJ Publishing Group Ltd ("BMJ") its licensees and where the relevant Journal is co-owned by BMJ to the co-owners of the Journal, to publish the Work in this journal and any other BMJ products and to exploit all rights, as set out in our [licence](#).

The Submitting Author accepts and understands that any supply made under these terms is made by BMJ to the Submitting Author unless you are acting as an employee on behalf of your employer or a postgraduate student of an affiliated institution which is paying any applicable article publishing charge ("APC") for Open Access articles. Where the Submitting Author wishes to make the Work available on an Open Access basis (and intends to pay the relevant APC), the terms of reuse of such Open Access shall be governed by a Creative Commons licence – details of these licences and which [Creative Commons](#) licence will apply to this Work are set out in our licence referred to above.

Other than as permitted in any relevant BMJ Author's Self Archiving Policies, I confirm this Work has not been accepted for publication elsewhere, is not being considered for publication elsewhere and does not duplicate material already published. I confirm all authors consent to publication of this Work and authorise the granting of this licence.



1  
2  
3  
4 1 Pregnancy among Adolescents Girls in Humanitarian settings: A case in  
5 2 Refugee Camp of Gambella Regional state, Community Based Cross-  
6 3 Sectional Study, Southwest Ethiopia, 2021  
7  
8  
9

10 5 [Koang Nyak Bol \(koang.nb2013@gmail.com\)](mailto:koang.nb2013@gmail.com)<sup>1</sup>, [Ebissa Negera \(ebissanegera@yahoo.com\)](mailto:ebissanegera@yahoo.com)<sup>2</sup>, [Abdi Geda](mailto:abdi.geda@meu.edu.et)  
11  
12 6 [Gedefa \(abdi.geda@meu.edu.et\)](mailto:abdi.geda@meu.edu.et)<sup>2</sup>  
13

14 7 1 Regional Health Office, Gambella, Gambella Regional State, Ethiopia

15  
16 8 2 Public Health Departments, College of Health Science, Mettu University, Mettu, Oromia Region,  
17  
18 9 Ethiopia  
19

20  
21 10 **Correspondence:** Abdi Geda Gedefa  
22

23 11 Public Health Department, College of Health Science, Mettu University, PO Box: 318, Mettu, Oromia  
24  
25 12 Region, Ethiopia; *Email:* [abdi.geda@meu.edu.et](mailto:abdi.geda@meu.edu.et)  
26

27 13 *ORCID ID:* <https://orcid.org/0000-0003-3534-4308>  
28

29 14 **ABSTRACT**

30  
31 15 **Objective:** The aim of this study was to assess the prevalence of pregnancy and associated factors among  
32  
33 16 adolescent girls in Nguenyiel refugee camp.  
34

35  
36 17 **Design:** cross-sectional study was employed to conduct this study.  
37

38  
39 18 **Setting:** A community based cross sectional study was done in Nguenyiel refugee camp  
40

41  
42 19 **Participants:** Four hundred fourteen adolescent girls participated on this study. The Systematic random  
43  
44 20 sampling technique was used to select respondents. Data were collected using a well-structured and pretested  
45  
46 21 questionnaire. Pregnancy test was done using HCG test. Bivariate and Multivariate logistic regression analysis  
47  
48 22 was run to identify factors associated with adolescent pregnancy.  
49

50  
51 23 **Results:** The prevalence of pregnancy among adolescent girls in the Nguenyiel refugee camp was 21.7%  
52  
53 24 (95% C.I: 17.6-25.6). Factors associated with adolescent pregnancy were age (17-19 years) (AOR: 2.79; 95%  
54  
55 25 C.I: 1.55-5.05); Educational status: Primary education (AOR: 7.69; 95% C.I: 3.55-16.68); No formal education  
56  
57 26 (AOR: 3.42; 95% C.I: 1.59-7.36), and Household living arrangement: Living with none of biological parents  
58  
59 27 (AOR: 2.14; 95% C.I: 1.02-4.49); Living with either of a biological parent (AOR: 3.71; 95% C.I: 1.76-7.81).  
60

1  
2  
3 28 **Conclusions and Recommendations:** This study showed that there is a high prevalence of pregnancy among  
4  
5 29 adolescent girls in the study setting. Age (17-19 years), Educational status, and Household living arrangement  
6  
7 30 (Live with none of the biological parents; Live with either of biological parents) were among the factors  
8  
9 31 significantly associated with adolescent pregnancy. Hence, health workers and other stakeholders in the camps  
10  
11 32 should focus on strengthening adolescent sexual health education giving especial attention to late adolescents,  
12  
13 33 uneducated and live without biological family.

14  
15  
16 34 **Key words:** Adolescents, pregnancy, Gambella, Nguenyiel, Refugee, Ethiopia.

#### 17 35 **Strength and limitation of this study**

- 18  
19  
20  
21 36 • Conducting community-based studies, using primary data including collecting urine samples directly from  
22  
23 37 study participants in humanitarian settings, is strength.
- 24  
25 38 • The Human chorionic gonadotropin (HCG) test cannot detect a pregnancy that is less than a week old.
- 26  
27 39 • Since adolescent pregnancy is a sensitive issue, respondents may commit social desirability bias.
- 28  
29 40 • Therefore, the prevalence of pregnancy among adolescent girls identified by this study among study  
30  
31 41 participants might be higher than the one reported by this study.

#### 32 42 **INTRODUCTION**

33  
34 43 Each year, an estimated 21 million adolescent girls become pregnant every year and approximately 12 million  
35  
36 44 of them give birth worldwide(1). At least 777,000 births occur to adolescent girls younger than 15 years in  
37  
38 45 developing countries(1). Adolescent pregnancy is associated with higher risks of Adverse Birth Outcomes  
39  
40 46 such as preterm birth, Low Birth Weight (LBW), Intra uterine growth retardation (IUGR), stillbirth, unsafe  
41  
42 47 abortion, maternal and neonatal mortality and morbidity compared with women in their twenties (2–10).  
43  
44 48 Complications from pregnancy and childbirth are the leading cause of death among adolescent girls(11,12).  
45  
46 49 Moreover, adolescent pregnancy is associated with social and economic problems like school drop-out,  
47  
48 50 unemployment, and limited future opportunities, risk of remaining poor and, and increased cost for health care  
49  
50 51 (3,13).

51  
52 52 Many teenage pregnancies in Ethiopia occur within marriage(14). Similarly, other studies showed that the  
53  
54 53 prevalence of pregnancy among adolescent girls in humanitarian settings (refugee camps or settlements) is  
55  
56  
57  
58  
59  
60

1  
2  
3 54 30% higher than among their non-displaced counterparts (13, 14). This is due to the fact that adolescents in  
4  
5 55 humanitarian settings are extremely vulnerable to early sexual practice, violence, and exploitation or abuse  
6  
7 56 compared with their counterparts in general population (15–17). The experience of forced migration impacts  
8  
9 57 refugee adolescent girls' decision-making power related to their sexual relationships and reproductive life (10).  
10  
11 58 Hence, adolescents may lack the autonomy to determine over their affairs including their sexual and  
12  
13 59 reproductive health and rights (12,18). Adolescents are also the only age group for whom Acquired Immune  
14  
15 60 deficiency syndrome (AIDS) deaths are on the rise(11).

16  
17  
18  
19 61 According to the Ethiopian Demographic and health survey and many other studies, the study area, Gambella  
20  
21 62 Regional State of Ethiopia, has high unmet need for family planning (23%)(14), high polygamy practice  
22  
23 63 (21%)(19) and highest Human immune deficiency Virus (HIV)/sexually transmitted infections (STIs)  
24  
25 64 prevalence in the country due to multiple factors such as, low service coverage, high prevalence of male  
26  
27 65 uncircumcision, early sexual initiation among adolescents related to traditional malpractice like “*Tifo bet*” (20)  
28  
29 66 and environmental factors like presence Gold Mining Workers(21) and others (14,18,20,22–24). Besides,  
30  
31 67 majority of the refugee community including adolescents are those who lost one or both of their parents during  
32  
33 68 the conflict. This leaves adolescent girls helpless and enforce them to be engaged risky sexual behaviours.  
34  
35 69 However, there was no study conducted to determine the prevalence and factors associated with pregnancy  
36  
37 70 among adolescent refugees in humanitarian settings. This study, therefore, aimed at assessing the prevalence of  
38  
39 71 pregnancy among adolescent girls and associated factors in the Nguenyiel refugee camp, Gambella region,  
40  
41 72 Southwest Ethiopia.

## 73 **METHODS AND MATERIALS**

### 74 **Study Design and Setting**

75 A community-based cross-sectional study was conducted in Nguenyiel refugee camp, Gambella region, from  
76 May 15 to June 15, 2021. Gambella region of Ethiopia hosted a 337,081 refugee population from the bordering  
77 country of South Sudan in 7 refugee camps (as of May 2021). The Nguenyiel refugee camp is the newest and  
78 largest camp in Ethiopia. It opened to accommodate the new refugee influx from South Sudan following the  
79 escalation of conflict in that country in July 2016. It is located in Itang special woreda (district). It is located

1  
2  
3 80 about 769 km from the capital Finfinnee/Addis Ababa, and 55 km from the region's capital, Gambella (25)  
4  
5 81 (*See figure 1*). It has 10,916 households and total populations of 90,506 with Male (43,757) and Female  
6  
7 82 (46,747). Adolescents constitute majority of the women in the Reproductive age in the camp  
8  
9

## 10 83 Population

### 11 12 84 Source population

13  
14 85 The source populations were all adolescent girls (10-19 years) in the Nguenyiel refugee camp. The study  
15  
16 86 populations were adolescent girls in the selected households who participated on this study.  
17

### 18 19 87 Eligibility Criteria

#### 20 21 88 Inclusion criteria

22  
23 89 All girls in the adolescence age interval (10-19) who were residents in the Nguenyiel refugee camp at least for  
24  
25 90 the last six months before the data collection were considered eligible.  
26

#### 27 91 Sample size determination

28  
29 92 The sample size was calculated for both objectives. For the first objective, sample size was  
30  
31 93 calculated using a single population proportion formula with the assumptions of:  $Z = 1.96$  at 95%  
32  
33 94 confidence interval,  $d = \text{Margin of error}$  assumed to be (0.05),  $P = \text{prevalence of pregnancy in}$   
34  
35 95 adolescent from previous studies (2), and 10% non-response rate;  $n = Z\alpha/2p(1-p)/d^2 = 421$   
36

37  
38 96 The sample size for the second objective was calculated by using the double population  
39  
40 97 proportion formula using Epi info version 3.0 statistical software by considering the following  
41  
42 98 assumptions after reviewing previous literature:  $Z\alpha/2$ : 1.96 at 95% confidence level,  $Z\beta$ : power =  
43  
44 99 statistical power of 80%,  $P1$ : the probability of outcome in the unexposed,  $P2$ : the probability of  
45  
46 100 outcome in the exposed and  $r$ : ratio of unexposed to exposed (Table 1).  
47

48  
49 101 As shown in the above table, since the calculated sample sizes for the second objective are less  
50  
51 102 than that of the first objective ( $n = 421$ ), finally, the larger sample size ( $n = 421$ ) was taken and  
52  
53 103 used for this study.  
54  
55

56 104  
57 105  
58 106  
59 107  
60

108  
109  
110 Table 1: Sample size calculation based on the significant factors of adolescent pregnancy;  
111 Nguenyiel refugee camp, Gambella region, southwest Ethiopia, 2021.

| S/no. | Significant factors associated with adolescent pregnancy & citations  | Power | 95% C.I | The proportion of pregnancy among non-exposed adolescent girls (P1) | The proportion of pregnancy among exposed (P2) | Risk Ratio (r) | AOR   | n <sub>1</sub> | n <sub>total</sub> |
|-------|-----------------------------------------------------------------------|-------|---------|---------------------------------------------------------------------|------------------------------------------------|----------------|-------|----------------|--------------------|
| 1     | Educational status [No formal education Vs. Secondary and above] (26) | 80%   | 1.96    | 31.0%                                                               | 7.4%                                           | 0.24           | 3.83  | 164            | 181                |
| 2     | Modern contraceptive use [Users Vs. Non-users] (27)                   | 80%   | 1.96    | 64.6%                                                               | 19.2%                                          | 0.29           | 10.62 | 131            | 144                |
| 3     | Marital status [Married Vs. Single (not-married)] (27)                | 80%   | 1.96    | 3.80%                                                               | 54.4%                                          | 14.3           | 2.16  | 33             | 37                 |

112

### 113 Sampling techniques and Procedures

114 A pre-study survey was conducted in the Nguenyiel refugee camp to generate a sampling  
115 frame (i.e., to identify families with adolescent girls), Accordingly, around 4100 households  
116 with adolescent girls were identified and recorded during the pre-study survey. Then, the 421  
117 respondents in the Nguenyiel refugee camp were chosen using a systematic random  
118 sampling technique. The sampling interval was calculated by dividing the number of  
119 households with adolescent girls in the Nguenyiel refugee camp ( $N = 4100$ ) by the sample  
120 size ( $n = 421$ ), resulting in  $K = 4100/421 = 9$ . As a result, every ninth household with an  
121 adolescent was chosen. In cases where a household had two or more adolescents, the lottery  
122 technique was employed to choose one adolescent girl that was interviewed.

## 123 Operational definitions

124 **Adolescent pregnancy:** In this study, adolescent pregnancy is defined as a current  
125 conception (pregnancy) occurring in a girl aged 10 to 19 (i.e., before the age of 20),  
126 regardless of marital status (28)

127 **Communication on sexual and reproductive health (SRH) issues:** An adolescent girl  
128 was considered to have parent-adolescent communication on SRH issues if she discussed with  
129 either of her parents at least one of the SRH issues such as menstrual cycle and fertile period, how  
130 one can get pregnant(29).

131 **Knowledge of modern contraceptive methods:** Knowledge of modern contraceptive  
132 methods among adolescent girls was measured based on the score or correctness of  
133 response to the 7 modern contraceptive knowledge-tracing questions.

134 Adolescent girls who responded "Yes" (scored) five or more, 3 to 4, and two or less were  
135 considered to have "**comprehensive knowledge, good knowledge, and poor knowledge**  
136 about contraceptive methods, respectively(29).

## 137 Data collection Tools and Procedures

138 The data was gathered by eight trained diploma nurses and two supervisors with a BSc degree in public health.  
139 A well-structured questionnaire was used in a face-to-face interviewer-administered data collection method.  
140 The questionnaire was adapted from different literature and pretested on sites other than the study area before  
141 the commencement of actual data collection (14,24,30). It contained socio-demographic, family, and  
142 individual-level characteristics, including sexual and reproductive health knowledge, modern contraceptive  
143 knowledge, and other pregnancy-related characteristics. Pregnancy in adolescent girls was determined using  
144 urine Human Chorionic Gonadotropin (HCG) test kits. Each study participant was asked before collecting a  
145 urine sample if she was pregnant or if the pregnancy was visible to the data collectors at the time of data  
146 collection (interviews). Urine samples were then collected from all study participants except those whose  
147 pregnancies had been confirmed.

## 148 Data Quality control and Analysis

149 The questionnaire was first prepared in English and then translated into the local language (Nuer).  
150 Then, it was translated back into English by a different language expert to verify its consistency.  
151 Data collectors and supervisors were provided a two-day training on the importance and objective  
152 of the study.

153 Data collection tools, sampling methods, interviewing techniques, and important precautions and  
154 procedures to be followed while conducting the HCG pregnancy test. The questionnaire was  
155 pretested on 5% of the sample size in places other than the study area. The completeness and  
156 consistency of the data were checked by supervisors on a daily basis. After that, the data was  
157 entered into Epidata software version 3.1 and exported to SPSS version 22. Frequencies and  
158 cross-tabulations were used to check for missed values. Descriptive analysis was done on socio-  
159 demographic, individual-level, and related characteristics and presented using tables and graphs.

160 Bivariate and multivariate logistic regression analysis was done to identify factors  
161 associated with the outcome variable. Accordingly, variables with a p-value  $< 0.25$  on bi-  
162 variable logistic regression were taken as candidates for multivariate analysis. The goodness of fit  
163 for the final regression model was checked by the Hosmer-Lemeshow goodness of fit test at a p-  
164 value of  $> 0.05$ . On multivariate logistic regression analysis, variables with a p-value of less than  
165 0.05 at a 95% confidence level were declared significant. The adjusted odds ratio is used to  
166 measure the strength of the association.

## 167 Patient and Public Involvement

168 No Patient and public involvement

## 169 RESULTS

### 170 Socio-Demographic Characteristics of Respondents

171 A total of 414 adolescent girls (10–19 years) participated in this study, making the response rate 98.3%. The  
172 mean age of respondents was 16.8 years with  $\pm 1.52$  SD. The majority of respondents, 241 (58.2%) were late-  
173 stage adolescents (17-19 years), and more than one-third of respondents, 164 (39.6%), were middle adolescent

174 girls (14-16 years), while 9 (2.2%) were in the early adolescence stage (10-13 years). Nearly three-fourths of  
 175 respondents, 309 (74.6%), were protestants, while 57 (13.8%) and 32 (7.7%) were Seventh-Day Adventist and  
 176 Church of God, respectively. More than half, 221 (53.4%) had primary and nearly one-third of respondents,  
 177 129 (31.1%), had no formal education. Three-fourths of adolescent girls, 313 (75.6%) were single (not  
 178 married) and 101 (24.4%) were married or ever-married. The majority of married adolescents, 85 (84.2%), get  
 179 married while they are in their middle adolescence age (14-16 years); and one-fifth of marriages, 21 (20.8%),  
 180 were arranged marriages (Table 2).

181 Table 2: Socio-demographic characteristics of respondents (adolescent girls, N=414) in  
 182 Nguennyiel refugee camp, Gambella region, Southwest Ethiopia, September 2021.

| Variable                                  | Category                         | Frequency | Percent |
|-------------------------------------------|----------------------------------|-----------|---------|
| <b>Age category by adolescence stages</b> | Early adolescence (10-13 years)  | 9         | 2.20    |
|                                           | Middle adolescence (14-16 years) | 164       | 39.6    |
|                                           | Late adolescence (17-19 years)   | 241       | 58.2    |
| <b>Religion</b>                           | Protestant                       | 309       | 74.6    |
|                                           | Seventh-Day Adventist            | 57        | 13.8    |
|                                           | Church of God                    | 32        | 7.70    |
|                                           | Catholic                         | 16        | 3.90    |
| <b>Ethnicity</b>                          | Nuer                             | 414       | 100     |
| <b>Educational status</b>                 | Secondary and above              | 64        | 15.5    |
|                                           | Primary education (grade 1-8)    | 221       | 53.4    |
|                                           | No formal education              | 129       | 31.1    |
| <b>Marital status</b>                     | Single (Not married)             | 313       | 75.6    |
|                                           | Married and live together        | 79        | 19.1    |
|                                           | Married and separated            | 14        | 3.40    |
|                                           | Divorced                         | 8         | 1.90    |
| <b>Age at marriage by age groups</b>      | Married before 15 years          | 18        | 17.8    |
|                                           | Married between 15-19 years      | 83        | 82.2    |



|                                             |                                  |    |      |
|---------------------------------------------|----------------------------------|----|------|
| <b>Age at marriage by adolescence stage</b> | Early adolescence (10-13 years)  | 1  | 0.90 |
|                                             | Middle adolescence (14-16 years) | 85 | 84.2 |
|                                             | Late adolescence (17-19 years)   | 15 | 14.9 |
| <b>Marriage arranged by parents</b>         | Yes                              | 21 | 20.8 |
|                                             | No                               | 80 | 79.2 |

183

### 184 Family related - characteristics of respondents

185 Only one hundred twenty-six (30.4%) of the study participants had communication with their parents on sexual  
 186 and reproductive health (SRH) issues, while more than two thirds of adolescent girls (288, 69.6%) had no  
 187 communication with their parents on the issues. Nearly half of adolescents, 194 (46.9%), live with either of  
 188 their biological parents (single parent). One-fourth, 104 (25.4%), live with none of their biological parents, and  
 189 less than one fifth of adolescents, 75 (18.1%), live with both biological parents. The mean family size in  
 190 households of the respondents was 6.32 people, with  $\pm 1.86$  SD and a range of 2–13. The majority of adolescent  
 191 girls, 351 (84.8%), live in households with 5 or more people, three-fourths (75%) of whom live in large  
 192 families of 7 or more people (Table 3).

193 Table 3: Familial-level characteristics of respondents in Nguenyiel Refugee Camp Gambella  
 194 region, Southwest Ethiopia, September 2021.

| Variable                                             | Category                                   | Frequency | Percent |
|------------------------------------------------------|--------------------------------------------|-----------|---------|
| <b>Parent-adolescent communication on SRH issues</b> | Yes                                        | 126       | 30.4    |
|                                                      | No                                         | 288       | 69.6    |
| <b>Household living arrangement</b>                  | Live with both biological parents          | 75        | 18.1    |
|                                                      | Live with either of the biological parents | 194       | 46.9    |
|                                                      | Live with none of biological parents       | 104       | 25.4    |
|                                                      | Married (live together with husband)       | 40        | 9.60    |
| <b>Family size</b>                                   | Small family (4 persons and below)         | 63        | 15.2    |
|                                                      | Large family (5 and more persons)          | 351       | 84.8    |

195

### 196 Respondents Knowledge about contraceptive methods among

197 More than one-third of adolescent girls, 167 (40.3%), had poor knowledge of modern contraceptive methods;  
 198 118 (28.5%) and 129 (31.2%), respectively, had good and comprehensive knowledge of modern  
 199 contraceptives. The majority of respondents (326, 78.7%) knew or ever heard of Condom, 305 (73.7%) knew  
 200 or ever heard of oral contraceptive pills (OCP), more than half (218, 52.7%) knew or heard about injectables  
 201 (Depo-Provera & NET-EN), and 154 (37.2%) heard about implants (Table 4).

202  
 203 Table 4: Knowledge of modern contraceptive methods among adolescent girls (N=414) in Nguenyiel refugee  
 204 camp, Gambella region, Southwest Ethiopia, September 2021.

| Variable                                 | Category                | Frequency (N=414) | Percent |
|------------------------------------------|-------------------------|-------------------|---------|
| Knew or ever heard of OCP                | Yes                     | 305               | 73.7    |
| Knew or ever heard of injectable         | Yes                     | 218               | 52.7    |
| Knew or ever heard of a condom           | Yes                     | 326               | 78.7    |
| Knew or ever heard of implants           | Yes                     | 154               | 37.2    |
| Knew or ever heard of SDM                | Yes                     | 126               | 30.4    |
| Knew or ever heard of IUCD               | Yes                     | 126               | 30.4    |
| Knew or ever heard of sterilization      | Yes                     | 51                | 12.3    |
| Over all Knowledge about contraceptive n | Comprehensive knowledge | 129               | 31.2    |
|                                          | Good knowledge          | 118               | 28.5    |
|                                          | Poor knowledge          | 167               | 40.3    |

### 206 SRH characteristics (behaviours) of respondents

207 The mean age at menarche (first menstrual bleeding) was 12.5 years with  $\pm 1.99$  SD. Menarche in almost all  
 208 respondents, 403 (99.5%), occurred between 10 and 14 years of age. The mean age at first sexual intercourse  
 209 among respondents was 14.03 years, with  $\pm 3.88$  SD. Almost half of the adolescent girls, 193 (49.6%), were  
 210 sexually active before 15 years; two-thirds of the respondents, 257 (66.0%), were sexually active in middle  
 211 adolescence (14–16 years); and 338 (86.9%) of adolescents had sexual intercourse before 18 years. The  
 212 contraceptive prevalence rate (CPR) among adolescent girls was 27 (6.5%). Out of these, 23 (5.6%) of  
 213 adolescents had ever used injectables (Depo-Provera and/or NET-EN); 26 (6.3%) used condoms, and 27  
 214 (6.5%) of respondents used oral contraceptive pills (OCPs) (Table 5).

215 Table 5: Sexual behaviour (characteristics) of respondents (adolescent girls), (N = 414) in  
 216 Nguenyiel refugee camp, Gambella region, Southwest Ethiopia, September 2021.

| Variable | Category | Frequency | Percent |
|----------|----------|-----------|---------|
|----------|----------|-----------|---------|

|                                              |                               |     |       |
|----------------------------------------------|-------------------------------|-----|-------|
| <b>Adolescent girl had menarche</b>          | Yes (Menarche occurred)       | 405 | 97.8  |
|                                              | No (Menarche not occurred)    | 9   | 2.20  |
| <b>Sexual practice (N=414)</b>               | Yes (Ever had sexual interco  | 389 | 94.0  |
|                                              | No (Has not ever had sex )    | 25  | 6.00  |
| <b>Age at sexual practice by ag</b>          | Sexually active before 15 ye  | 193 | 49.6  |
| <b>(N=389)</b>                               |                               |     |       |
|                                              | Sexually active at 15-19 year | 196 | 50.4  |
| <b>Age at sexual intercourse stages</b>      | Early adolescence (10-13 ye   | 64  | 16.5  |
|                                              | Middle adolescence (14-16 y   | 257 | 66.0  |
|                                              | Late adolescence (17-19 year  | 68  | 17.5  |
| <b>Early sexual initiation(debut) (N</b>     | Yes                           | 338 | 86.9  |
|                                              | No                            | 51  | 13.1  |
| <b>Knowledge About contraceptive methods</b> | Comprehensive knowledge       | 129 | 31.2  |
|                                              | Good knowledge                | 118 | 28.5  |
|                                              | Poor knowledge                | 167 | 40.3  |
| <b>Total contraceptive use</b>               |                               | 88  | 21.26 |
| <b>Modern contraceptive use (N=414)</b>      |                               | 86  | 20.77 |
| <b>OCP (N=414)</b>                           |                               | 27  | 6.50  |
| <b>Injectable (N=414)</b>                    |                               | 23  | 5.60  |
| <b>condom (N=414)</b>                        |                               | 26  | 6.30  |
| <b>implant (N=414)</b>                       |                               | 3   | 0.70  |
| <b>SDM (N=414)</b>                           |                               | 2   | 0.50  |
| <b>IUCD (N=414)</b>                          |                               | 5   | 1.20  |

217 N = Sample size (no of response), OCP = Oral Contraceptive Pills, SDM = Standard Day  
 218 Method, IUCD = Intra Uterine Contraceptive Device

219

### 220 Prevalence of adolescent pregnancy in Nguenyiel refugee camp, Gambella region

221 The prevalence of pregnancy among adolescent girls in the Nguenyiel refugee camp was 21.7% (95% C.I:  
222 17.6-25.6). More than half of pregnant girls (51.1%) were middle adolescents (14–16 years) and 48.9% were  
223 late adolescents (17–19 years old).

### 224 Factors associated with pregnancy among Adolescent

225 Age (17–19 years), educational status (no formal education, primary education), and family structure (living  
226 with either biological parent; living with neither biological parent) were statistically significantly associated  
227 with pregnancy among adolescent girls (10–19 years) in Nguenyiel refugee camp.

228 The odds of pregnancy among late adolescent girls (17-19 years) was 2.8 times higher compared with  
229 adolescents 10-16 years of age (AOR: 2.8; 95% C.I: 1.6-5.1). Adolescent girls with primary education (grade  
230 1–8) were 7.7 times more likely to become pregnant compared with those with secondary and above (AOR:  
231 7.7; 95% C.I: 3.55–16.7). Similarly, the odds of pregnancy among adolescent girls with no formal education  
232 were 3.4 times higher compared with girls who attended secondary school and above (AOR: 3.4; 95% C.I: 1.6-  
233 7.4).

234 Odds of pregnancy among adolescent girls living with none of their biological parents were two times  
235 more likely to be pregnant compared with adolescents living with both biological parents (AOR: 2.1;  
236 95% C.I: 1.02-4.5). Likewise, the odds of pregnancy among adolescent girls living with either of their  
237 biological parents was 3.7 times higher compared with girls living with both of their biological parents (AOR:  
238 3.7; 95% C.I: 1.8–7.8) (Table 6).

239 Table 6: Factors associated with pregnancy among adolescent girls (10-19 years) in Nguenyiel refugee camp,  
240 Gambella region, Southwest Ethiopia, September 2021.

241

| Variable                    | Pregnancy (status)            | AOR (95% C.I) | P-value    |                             |                          |
|-----------------------------|-------------------------------|---------------|------------|-----------------------------|--------------------------|
|                             |                               |               |            | Yes (HCG positive)<br>N (%) | No(HCGnegative)<br>N (%) |
| Age (stages of adolescence) | 10-16 years                   | 46 (51.1)     | 127 (39.2) | 1                           |                          |
|                             | 17-19 years                   | 44 (48.9)     | 197 (60.8) | 2.79 (1.55-4.98)            | 0.001                    |
|                             | Secondary and above           | 26 (28.9)     | 38 (11.7)  | 1                           |                          |
| Educational status          | Primary education (grade 1-8) | 26 (28.9)     | 195 (60.2) | 7.69 (3.55-16.7)            | 0.001                    |
|                             | No formal education           | 38 (42.2)     | 91 (28.1)  | 3.42 (1.59-7.4)             | 0.002                    |

|                                       |                                        |           |            |                  |       |
|---------------------------------------|----------------------------------------|-----------|------------|------------------|-------|
| Sexual experience                     | Sexually active at 15-19 year-old      | 54 (60.0) | 142 (47.5) | 1                |       |
|                                       | Sexually active before 15 years of age | 36 (40.0) | 157 (52.5) | 1.39 (0.76-2.54) | 0.282 |
| Knowledge about contraceptive         | Comprehensive knowledge                | 37 (41.1) | 92 (28.4)  | 1                |       |
|                                       | Good knowledge                         | 20 (22.2) | 98 (30.2)  | 1.29 (0.62-2.65) | 0.496 |
|                                       | Poor knowledge                         | 33 (36.7) | 134 (41.4) | 1.73 (0.90-3.32) | 0.100 |
| Early sexual debut (before 18 years)  | No                                     | 6 (11.8)  | 84 (24.9)  | 1                |       |
|                                       | Yes                                    | 45 (88.2) | 254 (75.1) | 0.41 (0.14-1.17) | 0.096 |
| Parent-adolescent Communication (SRH) | Yes                                    | 40 (44.4) | 86 (26.5)  | 1                |       |
|                                       | No                                     | 50 (55.6) | 238 (73.5) | 1.37 (0.73-2.54) | 0.326 |
| Household living arrangement          | Live with both biological parents      | 29 (32.2) | 46 (14.2)  | 1                |       |
|                                       | Live with either of biological parent  | 23 (25.6) | 171 (52.8) | 3.71 (1.76-7.81) | 0.001 |
|                                       | Live with none of biological parents   | 25 (27.8) | 80 (24.7)  | 2.14 (1.02-4.45) | 0.043 |
|                                       | Married and live together husband      | 13 (14.4) | 27 (8.30)  | 2.04 (0.81-5.14) | 0.132 |

242

## 243 DISCUSSIONS

244 This study showed that the prevalence of pregnancy among adolescent girls (10–19 years) in the Nguenyiil  
 245 refugee camp was high. This finding is consistent with findings of similar studies conducted among South  
 246 Sudanese refugees (10–19 years) in the Bidibidi refugee settlement, northern Uganda (25%)(4), Eritrean  
 247 refugees in the northern Tigray region, Ethiopia (28.4%) (31), Somali refugees in Kobe refugee camp of  
 248 Somali region, Ethiopia (26.3%) (32), and among refugees in Thailand-Myanmar border settlement, South-east  
 249 Asia (33).

250 The observed similarity could be due to similar socio-demographic and socioeconomic characteristics in  
 251 humanitarian settings as well as similarity in the vulnerability of adolescent girls to SRH problems in  
 252 humanitarian settings.

253 The findings of this study are higher than the findings of similar studies among adolescent girls in non-  
 254 emergency (non-humanitarian) settings: in Africa (a pooled prevalence of 18.8%)(34). Arba Minch town,  
 255 Southern Ethiopia (7.7%),(35), Gambella region of Ethiopia (16.2%) and India (10%) (36).

1  
2  
3 256 The possible reasons for the difference in the prevalence of adolescent pregnancy in humanitarian settings  
4  
5 257 compared with non-emergency contexts could be due to differences in settings. That is, adolescents in  
6  
7 258 humanitarian settings are more vulnerable to poor socio-economic status following the disruption of family  
8  
9 259 structure, loss of father or mother, or both, during conflict or disaster.

10  
11 260 This in turn leads adolescents to hopelessness, being prone to gender-based violence and early marriage. In  
12  
13 261 addition to that, basic reproductive health care services like family planning, including health information  
14  
15 262 communication on reproductive issues, are less available in humanitarian settings than in non-humanitarian  
16  
17 263 settings.

18  
19  
20  
21 264 On the other hand, the finding of this study is lower than that of studies conducted in: Nigeria (45.4%)(37),  
22  
23 265 Eastern Ethiopia, (30.2%)(34), East Africa (pooled prevalence of 54.6%)(38), Uganda (35.8%)(39) and north  
24  
25 266 east Ethiopia (28.6%)(27). The possible explanation for this discrepancy could be difference in socio-  
26  
27 267 demographic, socio-economic, larger sample size and inclusion terminated pregnancy in the case of East  
28  
29 268 Africa pooled prevalence.

30  
31  
32 269 This study showed that pregnancy among refugee adolescents was associated with increasing age; the odds of  
33  
34 270 pregnancy among late adolescent girls (17–19 years) was higher than girls in the early and middle stages of  
35  
36 271 adolescence (10–16 years). This is in line with studies conducted in Eastern Ethiopia, East Africa, Northeast  
37  
38 272 Ethiopia, and Kenya. (27,34,38,40). This could be due to the fact that as age increases, teenagers will have  
39  
40 273 more exposure to sex and their chance of getting married also increase.

41  
42  
43 274 Adolescent girls with primary education (grade 1-8) were more likely to become pregnant compared with their  
44  
45 275 counterparts who attended secondary and above. Likewise, the odds of pregnancy among adolescents with no  
46  
47 276 formal education was high compared with girls who attained secondary and above.

48  
49  
50  
51 277 This is similar with finding of studies conducted in Eastern Ethiopia (41), South East Nigeria(37), a systematic  
52  
53 278 review and Meta-analysis in Africa(42) (42), a multi-level analysis in five East African countries(43).The  
54  
55 279 possible justification could be adolescent girls with lower educational attainment lack appropriate information  
56  
57 280 regarding the consequence of unsafe sexual practice as well as the means to avoid unwanted pregnancy.

1  
2  
3 281 This study showed that household living arrangements (family structure) were associated with adolescent  
4  
5 282 pregnancy: Adolescent girls living with none of their biological parents were more likely to be pregnant  
6  
7 283 compared with adolescents living with both biological parents (i.e., living in nuclear families). The odds of  
8  
9 284 pregnancy among adolescent girls living with either of their biological parents (single parent families) higher  
10  
11 285 compared with girls living with both of their biological parents. This is similar to the findings of studies  
12  
13 286 conducted in Southern Ethiopia (35), eastern Ethiopia(34) and north east Ethiopia (27). This could be because  
14  
15 287 adolescent girls who did not live with one or both of their biological parents lack parental support and  
16  
17 288 guidance. Adolescent girls might have lost one or both of their biological parents during the conflict.  
18  
19 289 Adolescents in this situation may feel helpless and hopeless and choose to get married or engage in unsafe sex  
20  
21 290 to secure their survival.

22  
23  
24 291 Finally, even though the authors have tried to maximize the quality of this study, it is important to note that  
25  
26 292 using HCG test to diagnose pregnancy might undermine the true figure of prevalence of adolescent pregnancy  
27  
28 293 as the HCG test cannot detect a pregnancy that is less than a week old.

29  
30 294 Similar, since sexuality is a sensitive issue, respondents might not disclose their true behaviour. This results in  
31  
32 295 social desirability bias. Therefore, the authors have forwarded the following recommendations for future  
33  
34 296 researchers to overcome the limitations committed in this study.

## 35 36 37 297 **CONCLUSIONS**

38 298 This study showed a high prevalence of pregnancy among refugee adolescent girls (10–19 years) in the  
39  
40 299 Nguenyiel refugee camp, Gambella region, Ethiopia. The significant factors associated with adolescent  
41  
42 300 pregnancy were: Age (17–19 years), educational status (no formal education; primary education), and  
43  
44 301 household living arrangement or family structure: Live with none of the biological parents; live with either of  
45  
46 302 the biological parents.

## 47 48 49 303 **Recommendation**

### 50 51 304 *Health Care Provider*

52 305 Health workers in the camps should work to strengthen targeted adolescent sexual health  
53  
54  
55 306 education and information, giving special attention to the uneducated, those living without  
56  
57  
58 307 biological family, and late adolescents.

1  
2  
3 308 Humanitarian organizations (MS, ARRA, UNHCR, etc.)

4 309 Strengthen adolescent-youth-friendly services and adolescent girls' empowerment in refugee camps.

6  
7 310 Strengthen health education and schooling for refugee adolescent girls.

8  
9 311 strengthen comprehensive sexuality education (CSE) programs at schools in refugee camps.

10  
11 312 Adolescent girls who have lost their parents should be given special attention.

12  
13 313 Regional Health Bureaus, Zonal and other Health Offices

14  
15 314 Strengthening intervention programs aimed at preventing pregnancy among refugee adolescents.

16  
17 315 Prepare programs and strategies (approaches) to support refugee adolescent girls living with none or either of  
18  
19 316 their biological parents

20  
21  
22  
23 317 Researchers

24 318 Future researchers should focus on exploring the underlying socio-cultural conditions through a mixed  
25  
26 319 approach (qualitative and quantitative study).

27  
28 320 Important points that are not addressed in this study, like the level of unmet need for family planning and the  
29  
30 321 prevalence of unwanted pregnancy, are among the issues that seek the attention of future researchers.

31  
32 322 *Consent to publish*

33 323 Not applicable.

34 324 *Availability of data and materials*

35 325 All the data used or mentioned in this research are available

36 326 *Competing interests*

37 327 The authors declare that they have no competing interests.

38 328 *Funding*

39 329 The authors declare that no financial support in the research, authorship, and publication of this article was  
40  
41 330 received

42 331 *Author's contribution*

43 332 **Koang Nyak Bol:** made a significant contribution to the conception, study design, execution,  
44  
45 333 acquisition of data, analysis, and interpretation and has agreed on the journal to which the article  
46  
47 334 has been submitted.

48 335 **Ebissa Negera:** took part in study design, execution, drafting, revising and critically reviewing  
49  
50 336 the article; gave final approval of the version to be published; agreed on the journal to which the  
51  
52 337 article has been submitted.



1  
2  
3 338 **Abdi Geda Gedefa:** contributed to planning, acquisition of data, analysis and interpretation,  
4  
5 339 revising and critically reviewing the article, writing the report, and agreed on the journal to which  
6  
7 340 the article has been submitted.  
8  
9

10 341 *Acknowledgement*

11 342 We would like to acknowledge Mettu University for financial support. We are also grateful to the data  
12  
13 343 collectors and respondents who took part in this study.  
14

15 344 *Abbreviations and Acronyms*

|        |       |                                                  |
|--------|-------|--------------------------------------------------|
| 16 345 | ASRH  | Adolescent Sexual And Reproductive Health        |
| 17     |       |                                                  |
| 18 346 | ARRA  | Administration For Refugees And Returnees Affair |
| 19     |       |                                                  |
| 20 347 | HCG   | Human Chorionic Gonadotropins                    |
| 21     |       |                                                  |
| 22 348 | IUGR  | Intra-Uterine Growth Restriction                 |
| 23     |       |                                                  |
| 24 349 | LBW   | Low-Birth Weight                                 |
| 25     |       |                                                  |
| 26 350 | OCP   | Oral Contraceptive Pills                         |
| 27     |       |                                                  |
| 28 351 | LMICs | Low And Middle-Income Countries                  |
| 29     |       |                                                  |
| 30 352 | SSA   | Sub-Sahara Africa                                |
| 31     |       |                                                  |
| 32 353 | SDM   | Standard Day Method                              |
| 33     |       |                                                  |
| 34 354 | SRH   | Sexual And Reproductive Health;                  |
| 35     |       |                                                  |
| 36 355 | RC    | Refugee Camp                                     |
| 37     |       |                                                  |
| 38     |       |                                                  |
| 39     |       |                                                  |
| 40     |       |                                                  |
| 41     |       |                                                  |
| 42     |       |                                                  |
| 43     |       |                                                  |
| 44     |       |                                                  |
| 45     |       |                                                  |
| 46     |       |                                                  |
| 47     |       |                                                  |
| 48     |       |                                                  |
| 49     |       |                                                  |
| 50     |       |                                                  |
| 51     |       |                                                  |
| 52     |       |                                                  |
| 53     |       |                                                  |
| 54     |       |                                                  |
| 55     |       |                                                  |
| 56     |       |                                                  |
| 57     |       |                                                  |
| 58     |       |                                                  |
| 59     |       |                                                  |
| 60     |       |                                                  |

356

## Declarations

Ethics approval and consent to participate

This study was done according to the Declaration of Helsinki.

Research Ethical Committee of Mettu University provided Ethical approval for this study with reference number: RPG/03/2013. The Gambella Regional Health Bureau and ARRA, Gambella Zonal office provided a formal letter of permission. Data collectors were trained on how to handle confidential and private participant information.

Confidentiality was assured by excluding participants' names from the data collection tools. The study purpose, procedure, and duration were clearly explained to study participants. Study participants engaged in the study were informed that they could skip any question they didn't want to respond to and could quit the interview if they felt discomfort. Then consent was obtained from the study participants who were 18 years of age or older. For those who were less than 18 years, assent was taken from the participants but consent was taken from their representatives based on article 25 of the Declaration of Helsinki.

## References

1. Adolescent pregnancy [Internet]. [cited 2022 May 5]. Available from: <https://www.who.int/news-room/fact-sheets/detail/adolescent-pregnancy>
2. Kawakita T, Wilson K, Grantz KL, Landy HJ, Huang CC, Gomez-Lobo V. Adverse Maternal and Neonatal Outcomes in Adolescent Pregnancy. *J Pediatr Adolesc Gynecol*. 2016;29(2):130–6.
3. Nguyen PH, Sanghvi T, Tran LM, Afsana K, Mahmud Z, Aktar B, et al. The nutrition and health risks faced by pregnant adolescents: Insights from a cross-sectional study in Bangladesh. *PLoS One*. 2017;12(6):1–13.
4. Bakesiima R, Cleeve A, Larsson E, Tumwine JK, Ndeezi G, Danielsson KG, et al. Modern contraceptive use among female refugee adolescents in northern Uganda: Prevalence and associated factors. *Reprod Health*. 2020;17(1):1–9.
5. Nove A, Matthews Z, Neal S, Camacho AV. Maternal mortality in adolescents compared with women of other ages: Evidence from 144 countries. *Lancet Glob Heal*. 2014;2(3):e155–64.
6. Parker AL, Parker DM, Zan BN, Min AM, Gilder ME, Ringringulu M, et al. e. 2018;(May).
7. Zhang T, Wang H, Wang X, Yang Y, Zhang Y, Tang Z, et al. The adverse maternal and perinatal outcomes of adolescent pregnancy: A cross sectional study in Hebei, China. *BMC Pregnancy Childbirth*. 2020;20(1):1–10.
8. World Health Organization Regional Office for South-East Asia. Adolescent Pregnancy Situation in South-East Asia Region. *Media Cent*. 2015;1–194.

- 1  
2  
3 390 9. Johnson W, Moore SE. Adolescent pregnancy, nutrition, and health outcomes in low- and  
4 391 middle-income countries: what we know and what we don't know. Vol. 123, BJOG: An  
5 392 International Journal of Obstetrics and Gynaecology. 2016. p. 1589–92.
- 7 393 10. Indarti J, Al Fattah AN, Dewi Z, Hasani RDK, Mahdi FAN, Surya R. Teenage Pregnancy:  
8 394 Obstetric and Perinatal Outcome in a Tertiary Centre in Indonesia. *Obstet Gynecol Int.*  
9 395 2020;2020.
- 11 396 11. Adolescent health and well-being | UNICEF [Internet]. [cited 2022 Jan 3]. Available from:  
12 397 <https://www.unicef.org/health/adolescent-health-and-well-being>
- 14 398 12. Adolescent pregnancy [Internet]. [cited 2022 Jan 3]. Available from:  
15 399 <https://www.who.int/news-room/fact-sheets/detail/adolescent-pregnancy>
- 17 400 13. Mekonnen T, Dune T, Perz J. Maternal health service utilisation of adolescent women in sub-  
18 401 Saharan Africa: A systematic scoping review. *BMC Pregnancy Childbirth.* 2019;19(1).
- 20 402 14. EDHS 2016 Team. Ethiopian Demographic and Health Survey. Report. 2016;
- 22 403 15. Morris JL, Rushwan H. Adolescent sexual and reproductive health: The global challenges.  
23 404 2015; Available from: <http://dx.doi.org/10.1016/j.ijgo.2015.02.006>
- 25 405 16. Kerner B, Manohar S, Mazzacurati C, Tanabe M. Adolescent Sexual and Reproductive Health  
26 406 in Humanitarian Settings [Internet]. Vol. 40, *Forced Migration Review.* 2012. 21–22 p.  
27 407 Available from: <http://www.fmreview.org/young-and-out-of-place>
- 29 408 17. Neal S, Mahendra S, Bose K, Camacho AV, Mathai M, Nove A, et al. The causes of maternal  
30 409 mortality in adolescents in low and middle income countries: Systematic review of the  
31 410 literature. *BMC Pregnancy Childbirth.* 2016;16(1):1–18.
- 33 411 18. Adolescent pregnancy | United Nations Population Fund [Internet]. [cited 2022 Jan 3].  
34 412 Available from: <https://www.unfpa.org/adolescent-pregnancy>
- 36 413 19. Tadesse A, Geda A. Why Syphilis Infection is High Among Pregnant Women in Refugee  
37 414 Camps ? A Case in Ethiopia. 2022;(March):481–9.
- 39 415 20. Qanche Q, Wondimu W, Asefa A, Yosef T, Midaksa G, Nigussie T. Factors Contributing to  
40 416 High HIV Prevalence in Majang Zone, Southwest Ethiopia: What Lies Beneath the Tip of the  
41 417 Iceberg? *J Multidiscip Healthc* [Internet]. 2021 [cited 2022 Sep 1];14:3273. Available from:  
42 418 </pmc/articles/PMC8630364/>
- 44 419 21. Nigussie T, Mamo Y, Qanche Q, Yosef T, Wondimu W, Asefa A. HIV Preventive Behaviors  
45 420 and Associated Factors among Gold Mining Workers in Dima District, Southwest Ethiopia,  
46 421 2019: Community-Based Cross-Sectional Study. *Biomed Res Int.* 2021;2021.
- 48 422 22. Kibret GD, Ferede A, Leshargie CT, Wagnaw F, Ketema DB, Alebel A. Trends and spatial  
49 423 distributions of HIV prevalence in Ethiopia. *Infect Dis Poverty* [Internet]. 2019 Oct 17 [cited  
50 424 2022 Jan 4];8(1):1–9. Available from:  
51 425 <https://idpjournal.biomedcentral.com/articles/10.1186/s40249-019-0594-9>
- 53 426 23. Central Statistical Agency Addis Ababa E. UNICEF Ethiopia. Ethiopia Demographic and  
54 427 Health Survey. Addis Ababa, Ethiopia, and Rockville, Maryland, USA: CSA and ICF.. Addis  
55 428 Ababa, Ethiopia, and Rockville, Maryland, USA: CSA and ICF. 2016. 249 p.
- 57 429 24. Ethiopian Public Health Institute (EPHI), ICF. Ethiopia Mini Demographic and Health Survey  
58 430 2019: Final Report [Internet]. 2021. 1–207 p. Available from:  
59 431 <https://dhsprogram.com/pubs/pdf/FR363/FR363.pdf>
- 60

- 1  
2  
3 432 25. UNHCR. Nguenyiel refugee camp. 2020;(March). Available from:  
4 433 <https://reliefweb.int/sites/reliefweb.int/files/resources/77009.pdf>  
5
- 6 434 26. Kefale B, Yalew M, Damtie Y, Adane B. A multilevel analysis of factors associated with  
7 435 teenage pregnancy in Ethiopia. *Int J Womens Health*. 2020;12:785–93.  
8
- 9 436 27. Habitu YA, Yalew A, Bisetegn TA. Prevalence and Factors Associated with Teenage  
10 437 Pregnancy, Northeast Ethiopia, 2017: A Cross-Sectional Study. *J Pregnancy* [Internet]. 2018  
11 438 [cited 2022 Mar 10];2018. Available from: [/pmc/articles/PMC6236922/](https://pubmed.ncbi.nlm.nih.gov/36236922/)  
12
- 13 439 28. Birhanu BE, Kebede DL, Kahsay AB, Belachew AB. Predictors of teenage pregnancy in  
14 440 Ethiopia: A multilevel analysis. *BMC Public Health* [Internet]. 2019 May 17 [cited 2022 May  
15 441 6];19(1):1–10. Available from: <https://link.springer.com/articles/10.1186/s12889-019-6845-7>  
16
- 17 442 29. Yimer AS, Modiba LM. Modern contraceptive methods knowledge and practice among blind  
18 443 and deaf women in Ethiopia. A cross-sectional survey. *BMC Womens Health*. 2019;19(1):1–  
19 444 13.  
20
- 21 445 30. Nguyen PH, Sanghvi T, Tran LM, Afsana K, Mahmud Z, Aktar B, et al. The nutrition and  
22 446 health risks faced by pregnant adolescents: Insights from a cross-sectional study in  
23 447 Bangladesh. *PLoS One* [Internet]. 2017 Jun 1 [cited 2022 May 6];12(6):e0178878. Available  
24 448 from: <https://journals.plos.org/plosone/article?id=10.1371/journal.pone.0178878>  
25
- 26 449 31. Gebrecherkos K, Gebremariam B, Gebeyehu A, Siyum H, Kahsay G, Abay M. Unmet need for  
27 450 modern contraception and associated factors among reproductive age group women in Eritrean  
28 451 refugee camps, Tigray, north Ethiopia: A cross-sectional study 11 *Medical and Health*  
29 452 *Sciences* 1117 *Public Health and Health Services* 11 *Medical and H*. *BMC Res Notes*  
30 453 [Internet]. 2018;11(1):1–6. Available from: <https://doi.org/10.1186/s13104-018-3956-7>  
31
- 32 454 32. Elnakib S, Hunersen K, Metzler J, Bekele H, Robinson WC. Child marriage among Somali  
33 455 refugees in Ethiopia: a cross sectional survey of adolescent girls and adult women. *BMC*  
34 456 *Public Health*. 2021;21(1):1–12.  
35
- 36 457 33. Parker AL, Parker DM, Zan BN, Min AM, Gilder ME, Ringringulu M, et al. Trends and birth  
37 458 outcomes in adolescent refugees and migrants on the Thailand-Myanmar border, 1986-2016:  
38 459 An observational study [version 1; referees: 2 approved]. *Wellcome Open Res*. 2018;3(0).  
39
- 40 460 34. Mezmur H, Assefa N, Alemayehu T. Teenage pregnancy and its associated factors in eastern  
41 461 Ethiopia: A community-based study. *Int J Womens Health*. 2021;13:267–78.  
42
- 43 462 35. Mathewos S, Mekuria A. Teenage Pregnancy and Its Associated Factors among School  
44 463 Adolescents of Arba Minch Town, Southern Ethiopia. *Ethiop J Health Sci* [Internet]. 2018  
45 464 May 18 [cited 2022 Mar 9];28(3):287–98. Available from:  
46 465 <https://www.ajol.info/index.php/ejhs/article/view/171332>  
47
- 48 466 36. Mahavarkar SH, Madhu CK, Mule VD. A comparative study of teenage pregnancy.  
49 467 <http://dx.doi.org/10.1080/01443610802281831> [Internet]. 2009 Aug [cited 2022 Mar  
50 468 9];28(6):604–7. Available from:  
51 469 <https://www.tandfonline.com/doi/abs/10.1080/01443610802281831>  
52
- 53 470 37. Uwaezuoke AI, Uzochukwu BS, Nwagbo DF, Onwujekwe OE. Determinants of Teenage  
54 471 Pregnancy in Rural Communities of Abia State, South East Nigeria. *Int J Med Heal Dev*  
55 472 [Internet]. 2004 Jun 18 [cited 2022 Mar 9];9(1):28–33. Available from:  
56 473 <https://www.ajol.info/index.php/jcm/article/view/10471>  
57
- 58 474 38. Worku MG, Tessema ZT, Teshale AB, Tesema GA, Yeshaw Y. Prevalence and associated  
59 475 factors of adolescent pregnancy (15–19 years) in East Africa: a multilevel analysis. *BMC*  
60

- 1  
2  
3 476 Pregnancy Childbirth. 2021;21(1):1–8.  
4  
5 477 39. Council T, District K, Sectional AC. Primary Health Care : Open Access Factors Associated  
6 478 with Teenage Pregnancy and its Effects in Kibuku. 2018;8(2).  
7  
8 479 40. Omoro T, Gray SC, Otieno G, Mbede C, Phillips-Howard PA, Hayes T, et al. Teen pregnancy  
9 480 in rural western Kenya: a public health issue. <http://mc.manuscriptcentral.com/rady> [Internet].  
10 481 2017 Oct 2 [cited 2022 Mar 9];23(4):399–408. Available from:  
11 482 <https://www.tandfonline.com/doi/abs/10.1080/02673843.2017.1402794>  
12  
13 483 41. Mezmur H, Assefa N, Alemayehu T. Teenage Pregnancy and Its Associated Factors in Eastern  
14 484 Ethiopia: A Community-Based Study. 2021 [cited 2022 Mar 9]; Available from:  
15 485 <http://doi.org/10.2147/IJWH.S287715>  
16  
17 486 42. Kassa GM, Arowojolu AO, Odukogbe AA, Yalew AW. Prevalence and determinants of  
18 487 adolescent pregnancy in Africa: a systematic review and Meta-analysis. *Reprod Health*  
19 488 [Internet]. 2018 Nov 29 [cited 2022 Mar 9];15(1). Available from:  
20 489 </pmc/articles/PMC6267053/>  
21  
22 490 43. Wado YD, Sully EA, Mumah JN. Pregnancy and early motherhood among adolescents in five  
23 491 East African countries: A multi-level analysis of risk and protective factors. *BMC Pregnancy*  
24 492 *Childbirth*. 2019;19(1):1–11.  
25

26 493

28 494 Figure 1: Map of Nguenyiel refugee camp, Gambella, Ethiopia.

30 495 Source: [nguenyiel refugee camp map - Bing](#))  
31  
32 496  
33  
34 497  
35  
36 498  
37  
38 499  
39  
40  
41  
42  
43  
44  
45  
46  
47  
48  
49  
50  
51  
52  
53  
54  
55  
56  
57  
58  
59  
60

Map of Nguenyyiel refugee Camp

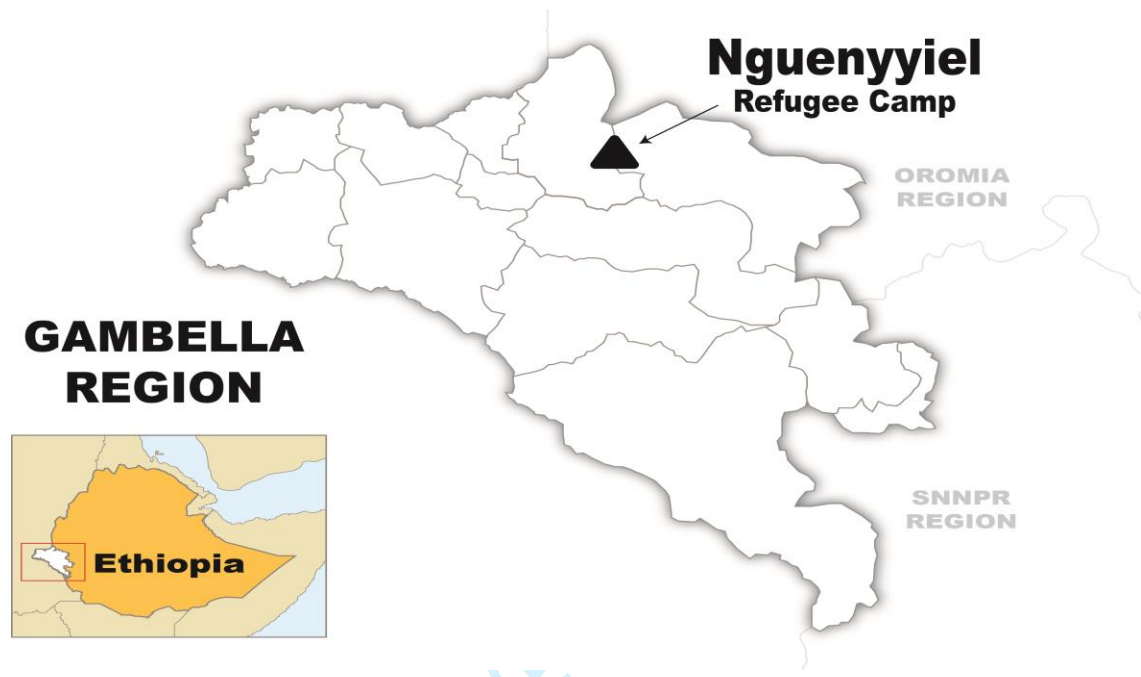

Figure 1. Map of Nguenyyiel refugee Camp, Gambella, Ethiopia.

Source: [nguennyiel refugee camp map - Bing](#)

STROBE Statement—Checklist of items that should be included in reports of *cross-sectional studies*

|                              | Item No | Recommendation                                                                                                                                                                                               | Page No |
|------------------------------|---------|--------------------------------------------------------------------------------------------------------------------------------------------------------------------------------------------------------------|---------|
| <b>Title and abstract</b>    | 1       | (a) Indicate the study's design with a commonly used term in the title or the abstract                                                                                                                       | 1       |
|                              |         | (b) Provide in the abstract an informative and balanced summary of what was done and what was found                                                                                                          | 1-2     |
| <b>Introduction</b>          |         |                                                                                                                                                                                                              |         |
| Background/rationale         | 2       | Explain the scientific background and rationale for the investigation being reported                                                                                                                         | 2-3     |
| Objectives                   | 3       | State specific objectives, including any prespecified hypotheses                                                                                                                                             | 1       |
| <b>Methods</b>               |         |                                                                                                                                                                                                              |         |
| Study design                 | 4       | Present key elements of study design early in the paper                                                                                                                                                      | 3       |
| Setting                      | 5       | Describe the setting, locations, and relevant dates, including periods of recruitment, exposure, follow-up, and data collection                                                                              | 3-5     |
| Participants                 | 6       | (a) Give the eligibility criteria, and the sources and methods of selection of participants                                                                                                                  | 4,6     |
| Variables                    | 7       | Clearly define all outcomes, exposures, predictors, potential confounders, and effect modifiers. Give diagnostic criteria, if applicable                                                                     | 6       |
| Data sources/<br>measurement | 8*      | For each variable of interest, give sources of data and details of methods of assessment (measurement). Describe comparability of assessment methods if there is more than one group                         | 6       |
| Bias                         | 9       | Describe any efforts to address potential sources of bias                                                                                                                                                    | 6       |
| Study size                   | 10      | Explain how the study size was arrived at                                                                                                                                                                    | 4-5     |
| Quantitative variables       | 11      | Explain how quantitative variables were handled in the analyses. If applicable, describe which groupings were chosen and why                                                                                 | 6       |
| Statistical methods          | 12      | (a) Describe all statistical methods, including those used to control for confounding                                                                                                                        | 6       |
|                              |         | (b) Describe any methods used to examine subgroups and interactions                                                                                                                                          | 6       |
|                              |         | (c) Explain how missing data were addressed                                                                                                                                                                  | 6       |
|                              |         | (d) If applicable, describe analytical methods taking account of sampling strategy                                                                                                                           | 6       |
|                              |         | (e) Describe any sensitivity analyses                                                                                                                                                                        |         |
| <b>Results</b>               |         |                                                                                                                                                                                                              |         |
| Participants                 | 13*     | (a) Report numbers of individuals at each stage of study—eg numbers potentially eligible, examined for eligibility, confirmed eligible, included in the study, completing follow-up, and analysed            | 4,6     |
|                              |         | (b) Give reasons for non-participation at each stage                                                                                                                                                         | NA      |
|                              |         | (c) Consider use of a flow diagram                                                                                                                                                                           |         |
| Descriptive data             | 14*     | (a) Give characteristics of study participants (eg demographic, clinical, social) and information on exposures and potential confounders                                                                     | 6       |
|                              |         | (b) Indicate number of participants with missing data for each variable of interest                                                                                                                          | 4,5,7   |
| Outcome data                 | 15*     | Report numbers of outcome events or summary measures                                                                                                                                                         | 7       |
| Main results                 | 16      | (a) Give unadjusted estimates and, if applicable, confounder-adjusted estimates and their precision (eg, 95% confidence interval). Make clear which confounders were adjusted for and why they were included |         |

|                          |    |                                                                                                                                                                            |           |
|--------------------------|----|----------------------------------------------------------------------------------------------------------------------------------------------------------------------------|-----------|
|                          |    | (b) Report category boundaries when continuous variables were categorized                                                                                                  | NA        |
|                          |    | (c) If relevant, consider translating estimates of relative risk into absolute risk for a meaningful time period                                                           | NA        |
| Other analyses           | 17 | Report other analyses done—eg analyses of subgroups and interactions, and sensitivity analyses                                                                             | 7         |
| <b>Discussion</b>        |    |                                                                                                                                                                            |           |
| Key results              | 18 | Summarise key results with reference to study objectives                                                                                                                   | 12, 13,17 |
| Limitations              | 19 | Discuss limitations of the study, taking into account sources of potential bias or imprecision. Discuss both direction and magnitude of any potential bias                 | 16        |
| Interpretation           | 20 | Give a cautious overall interpretation of results considering objectives, limitations, multiplicity of analyses, results from similar studies, and other relevant evidence | 16        |
| Generalisability         | 21 | Discuss the generalisability (external validity) of the study results                                                                                                      | 16        |
| <b>Other information</b> |    |                                                                                                                                                                            |           |
| Funding                  | 22 | Give the source of funding and the role of the funders for the present study and, if applicable, for the original study on which the present article is based              | 18        |

\*Give information separately for exposed and unexposed groups.

**Note:** An Explanation and Elaboration article discusses each checklist item and gives methodological background and published examples of transparent reporting. The STROBE checklist is best used in conjunction with this article (freely available on the Web sites of PLoS Medicine at <http://www.plosmedicine.org/>, Annals of Internal Medicine at <http://www.annals.org/>, and Epidemiology at <http://www.epidem.com/>). Information on the STROBE Initiative is available at [www.strobe-statement.org](http://www.strobe-statement.org).
